# Supplementary material
Source: MDPI journal article supplement (https://www.mdpi.com/2218-2004/10/4/112)
Supplement: s1 [file s1]

**Supporting information for:**  
**Al<sub>2</sub>C<sub>4</sub>H<sub>2</sub> Isomers with the Planar Tetracoordinate Carbon (ptC)/Aluminum (ptAl)**

Abdul Hamid Malhan <sup>1</sup>, Sony Sobinson <sup>1</sup>, Nisha Job <sup>1</sup>, Shilpa Shajan <sup>1</sup>, Surya Prakash Mohanty <sup>1</sup>,  
Venkatesan S. Thimmakondur <sup>2</sup>, and Krishnan Thirumoorthy <sup>1,\*</sup>

- 1 Department of Chemistry, School of Advanced Sciences, Vellore Institute of Technology,  
Vellore 632 014, Tamil Nadu, India
- 2 Department of Chemistry and Biochemistry, San Diego State University, San Diego, CA  
92182-1030, USA
- \* Correspondence: [thirumoorthy.krishnan@vit.ac.in](mailto:thirumoorthy.krishnan@vit.ac.in) (K.T.)

## Contents

|                 |    |
|-----------------|----|
| List of Figures | S2 |
| List of Tables  | S2 |

### List of Figures

|    |                                                                                                                                                                                                                                                                                                        |     |
|----|--------------------------------------------------------------------------------------------------------------------------------------------------------------------------------------------------------------------------------------------------------------------------------------------------------|-----|
| S1 | Isomers of $\text{Al}_2\text{C}_4\text{H}_2$ and their zero-point vibrational energy (ZPVE) corrected relative energies (in $\text{kcal mol}^{-1}$ ), dipole moments (in Debye), and number of imaginary frequencies (NImag) obtained at the $\omega\text{B97XD/6-311++G(2d,2p)}$ level of theory..... | S3  |
| S2 | Lone pairs and 2c–2e bonds of $\text{Al}_2\text{C}_4\text{H}_2$ isomers <b>3</b> , <b>4</b> , <b>14</b> , <b>18</b> , <b>20</b> , <b>21</b> , <b>22</b> , <b>28</b> , <b>31</b> , <b>34</b> , and <b>40</b> from AdNDP analysis at the $\omega\text{B97XD/6-311++G(2d,2p)}$ level of theory.....       | S6  |
| S3 | Nucleus-independent chemical shifts (NICSs; in ppm) for isomer <b>3</b> at the $\omega\text{B97XD/6-311++G(2d,2p)}$ level. NICS (1) (green color) is calculated at 1 Å above the ring, whereas NICS(0) (blue color) refers to on the plane values.....                                                 | S10 |

### List of Tables

|    |                                                                                                                                                                                                                                                                                                                                                                                              |     |
|----|----------------------------------------------------------------------------------------------------------------------------------------------------------------------------------------------------------------------------------------------------------------------------------------------------------------------------------------------------------------------------------------------|-----|
| S1 | Total energy (in a.u), zero-point vibrational energy (ZPVE; in a.u), ZPVE corrected total energy ( $E+\text{ZPVE}$ ; in a.u), relative energy ( $\Delta E + \text{ZPVE}$ ; in a.u and $\text{kcal mol}^{-1}$ ), and the number of imaginary frequencies (NImag) of various $\text{Al}_2\text{C}_4\text{H}_2$ isomers calculated at $\omega\text{B97XD/6-311++G(2d,2p)}$ level of theory..... | S11 |
| S2 | Total energy (in a.u), zero-point vibrational energy (ZPVE; in a.u), ZPVE corrected total energy ( $E+\text{ZPVE}$ ; in a.u), relative energy ( $\Delta E + \text{ZPVE}$ ; in a.u and $\text{kcal mol}^{-1}$ ), and the number of imaginary frequencies (NImag) of various $\text{Al}_2\text{C}_4\text{H}_2$ isomers calculated at $\text{B3LYP/6-311++G(2d,2p)}$ level of theory.....       | S14 |
| S3 | Natural atomic charges of hydrogen in isomers <b>3</b> , <b>4</b> , <b>14</b> , <b>18</b> , <b>20</b> , <b>21</b> , <b>22</b> , <b>28</b> , <b>31</b> , <b>34</b> , and <b>40</b> from NBO analysis at the $\omega\text{B97XD/6-311++G(2d,2p)}$ level of theory.....                                                                                                                         | S17 |
| S4 | The hyper conjugative interaction between the donor $\rightarrow$ acceptor orbitals of lone pair of aluminum in the isomers <b>3</b> , <b>4</b> , <b>18</b> , <b>21</b> , <b>22</b> , <b>28</b> , and <b>31</b> as determined by NBO analysis and calculated at $\omega\text{B97XD/6-311++G(2d,2p)}$ level of theory.....                                                                    | S18 |
| S5 | Occupancies of lone pairs for isomers <b>3</b> , <b>14</b> , <b>18</b> , <b>21</b> , <b>22</b> , <b>28</b> , <b>31</b> , and <b>40</b> from NBO analysis calculated at $\omega\text{B97XD/6-311++G(2d,2p)}$ level of theory.....                                                                                                                                                             | S19 |
| S6 | Optimized geometries of $\text{Al}_2\text{C}_4\text{H}_2$ isomers in Cartesian coordinates (in Angström units) obtained at $\omega\text{B97XD/6-311++G(2d,2p)}$ level of theory.....                                                                                                                                                                                                         | S20 |

|    |                                                                                                                                                                          |     |
|----|--------------------------------------------------------------------------------------------------------------------------------------------------------------------------|-----|
| S7 | Optimized geometries of isomers of $\text{Al}_2\text{C}_4\text{H}_2$ in Cartesian coordinates (in Angström units) obtained at B3LYP/6-311++G(2d,2p) level of theory..... | S36 |
|----|--------------------------------------------------------------------------------------------------------------------------------------------------------------------------|-----|

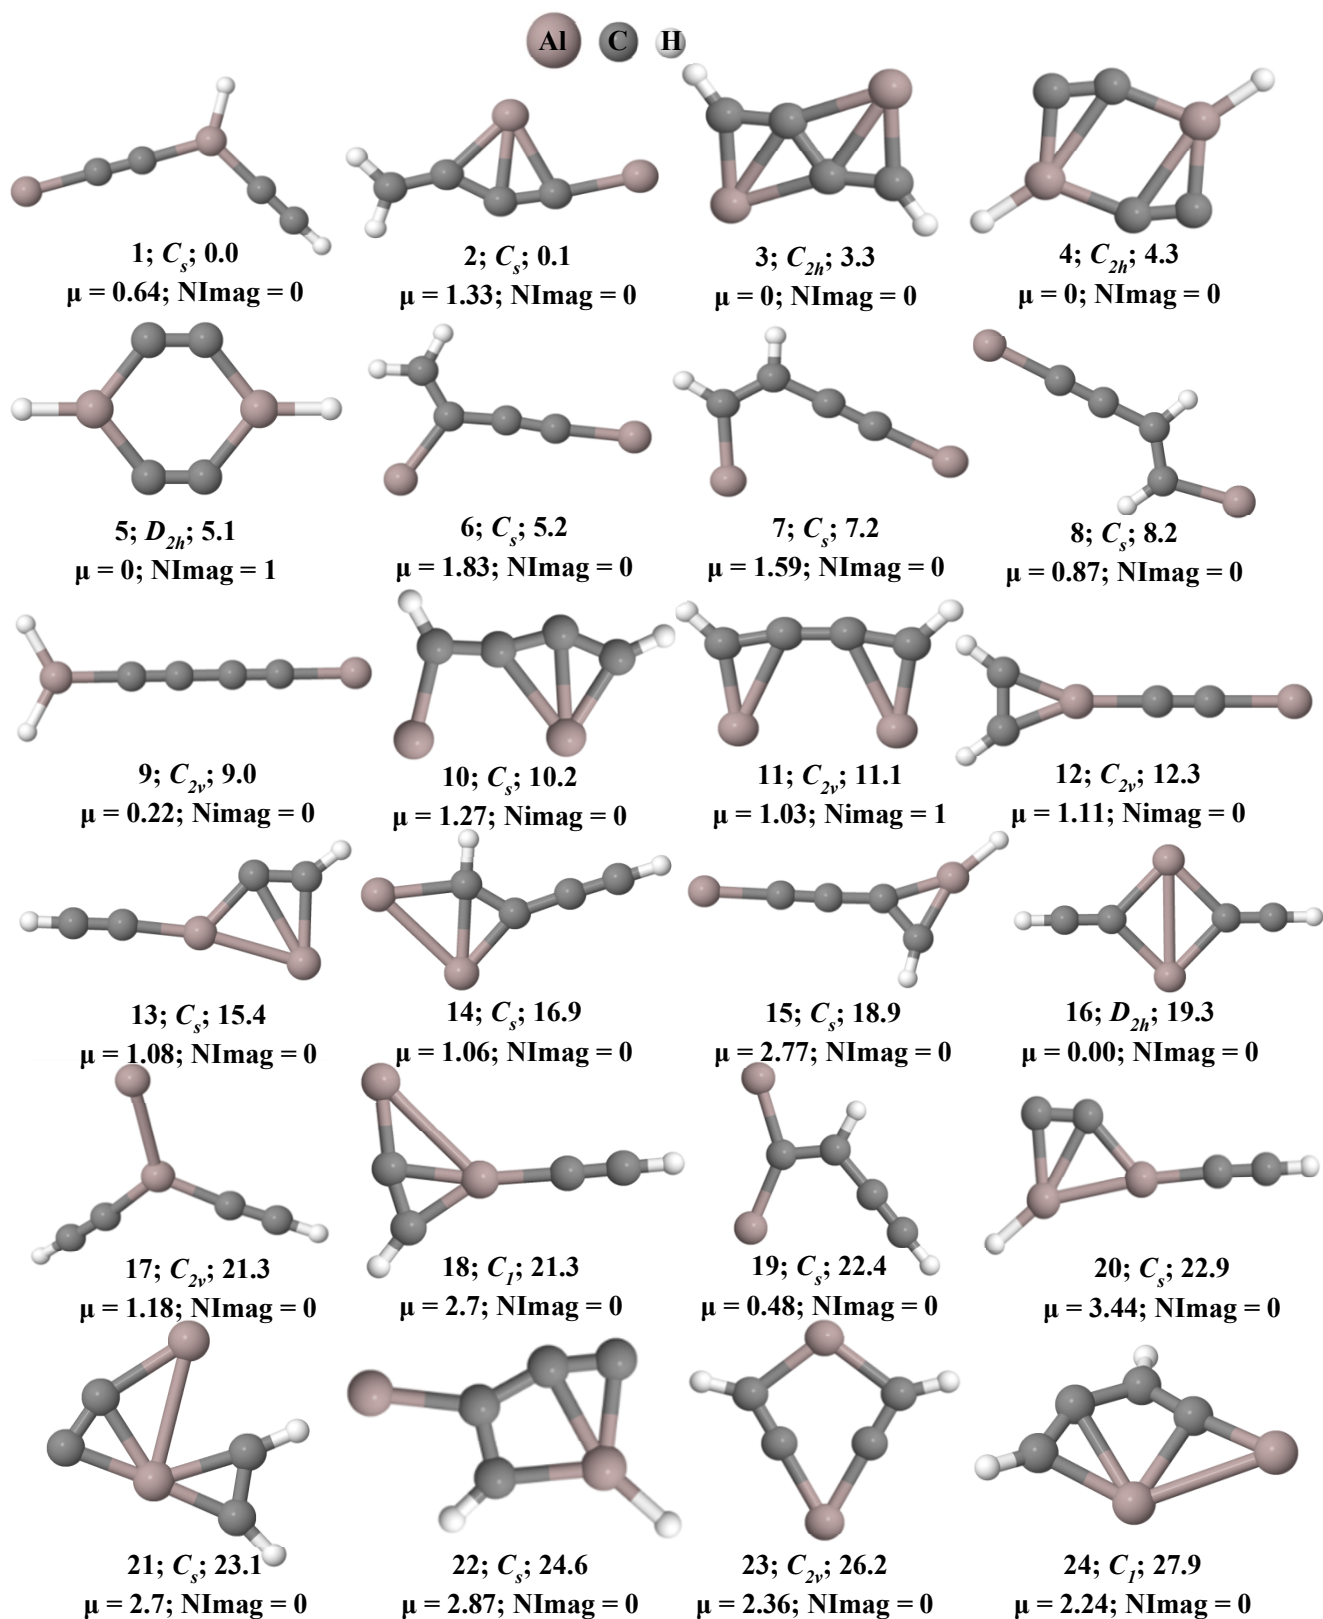

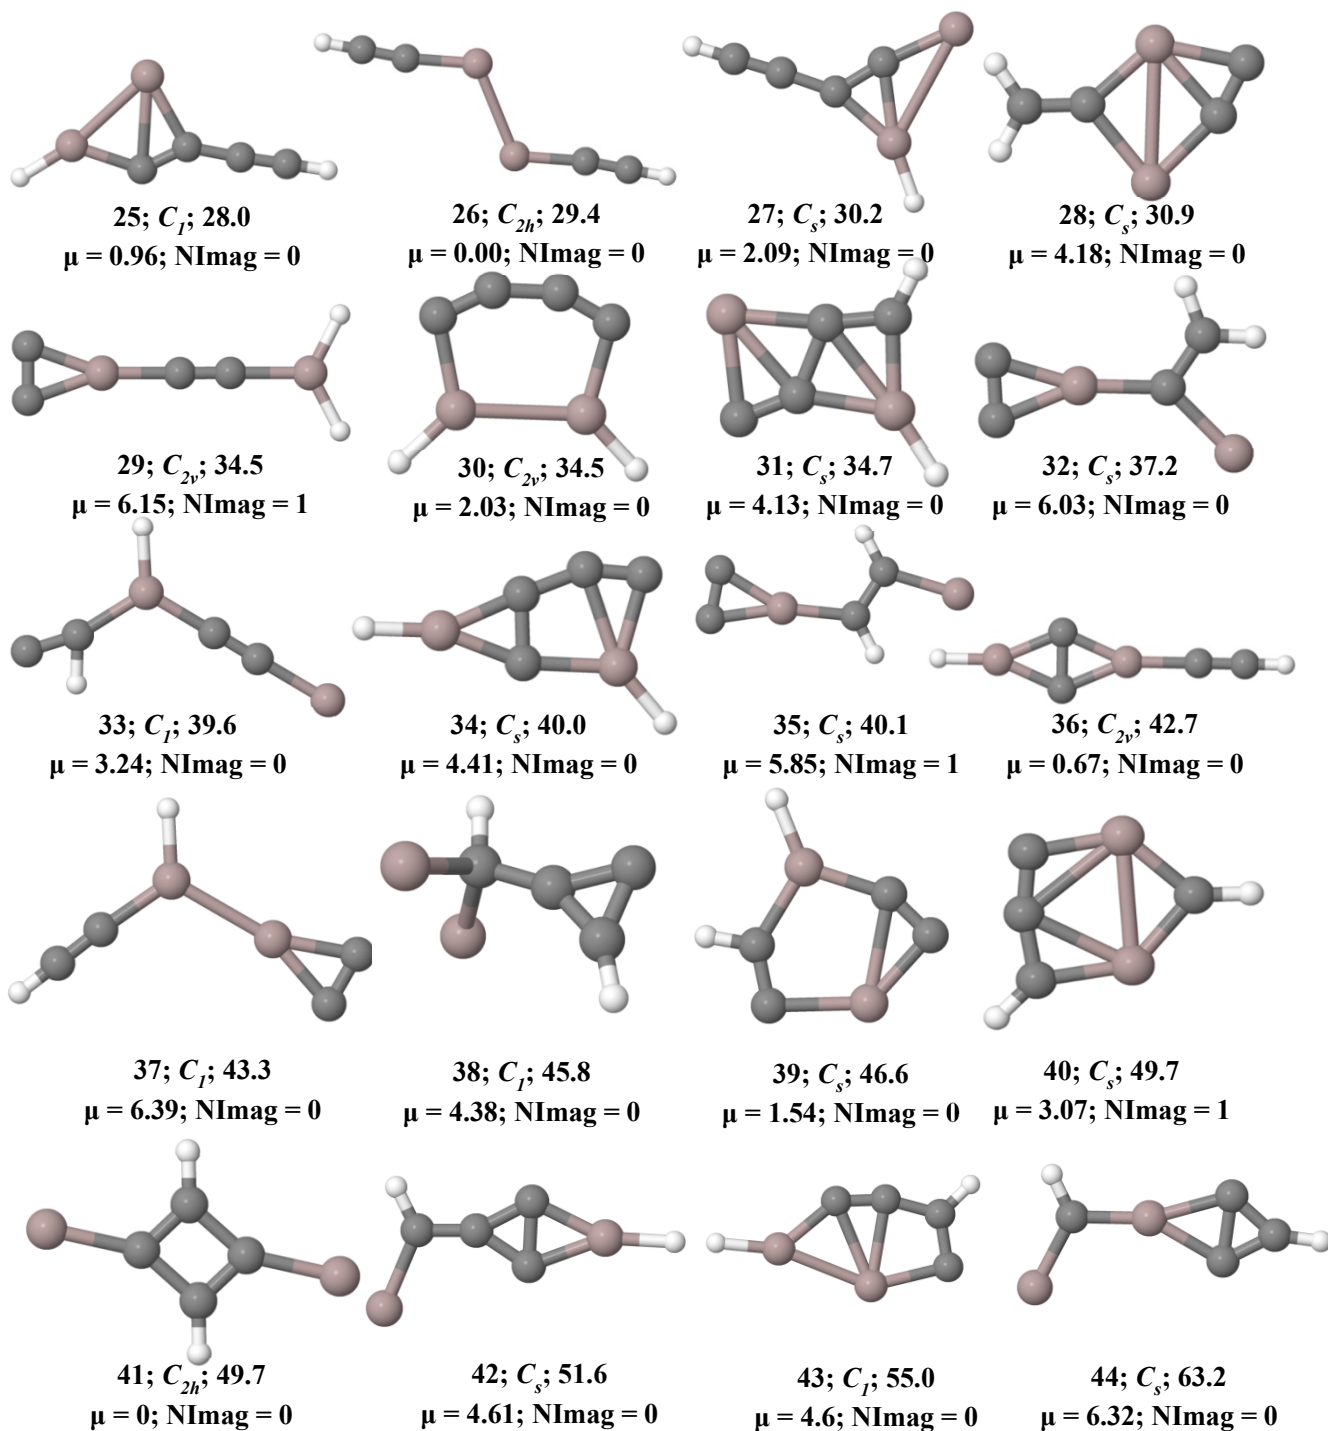

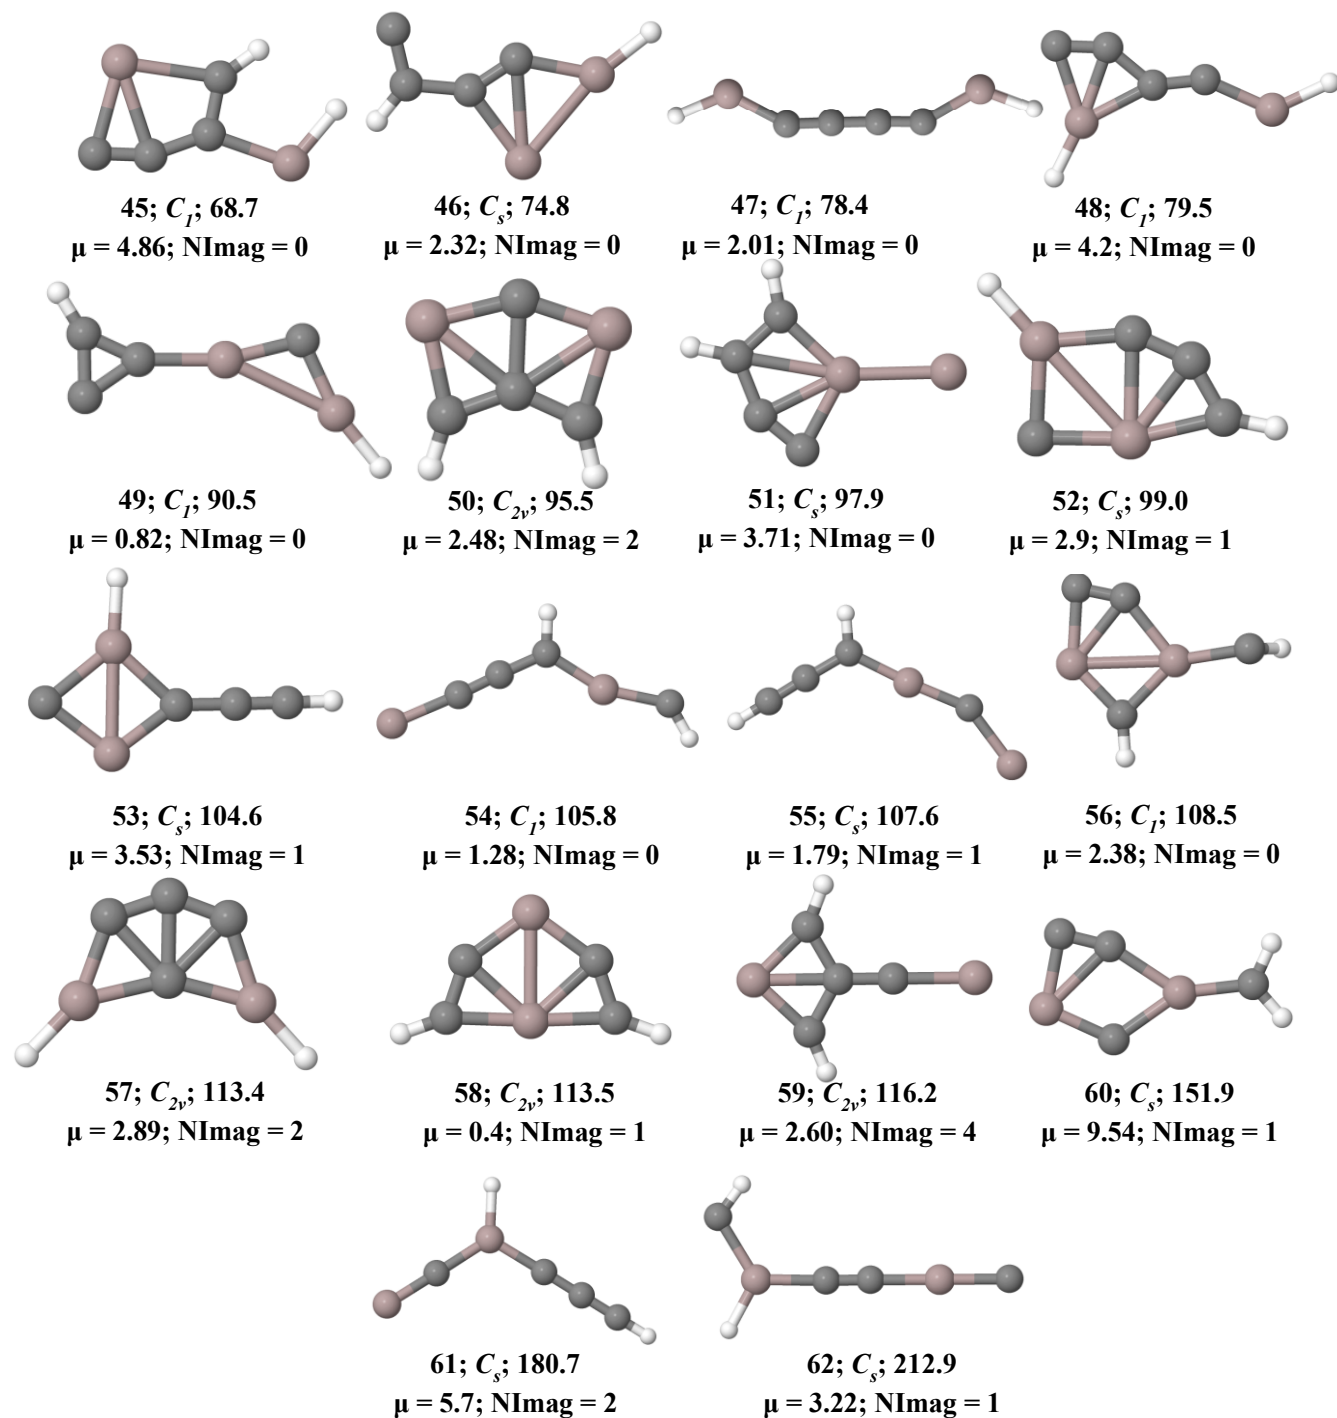

**Figure S1.** Isomers of  $\text{Al}_2\text{C}_4\text{H}_2$  and their zero-point vibrational energy (ZPVE) corrected relative energies (in  $\text{kcal mol}^{-1}$ ), dipole moments (in Debye), and number of imaginary frequencies (NImag) obtained at the  $\omega\text{B97XD/6-311++G(2d,2p)}$  level of theory.

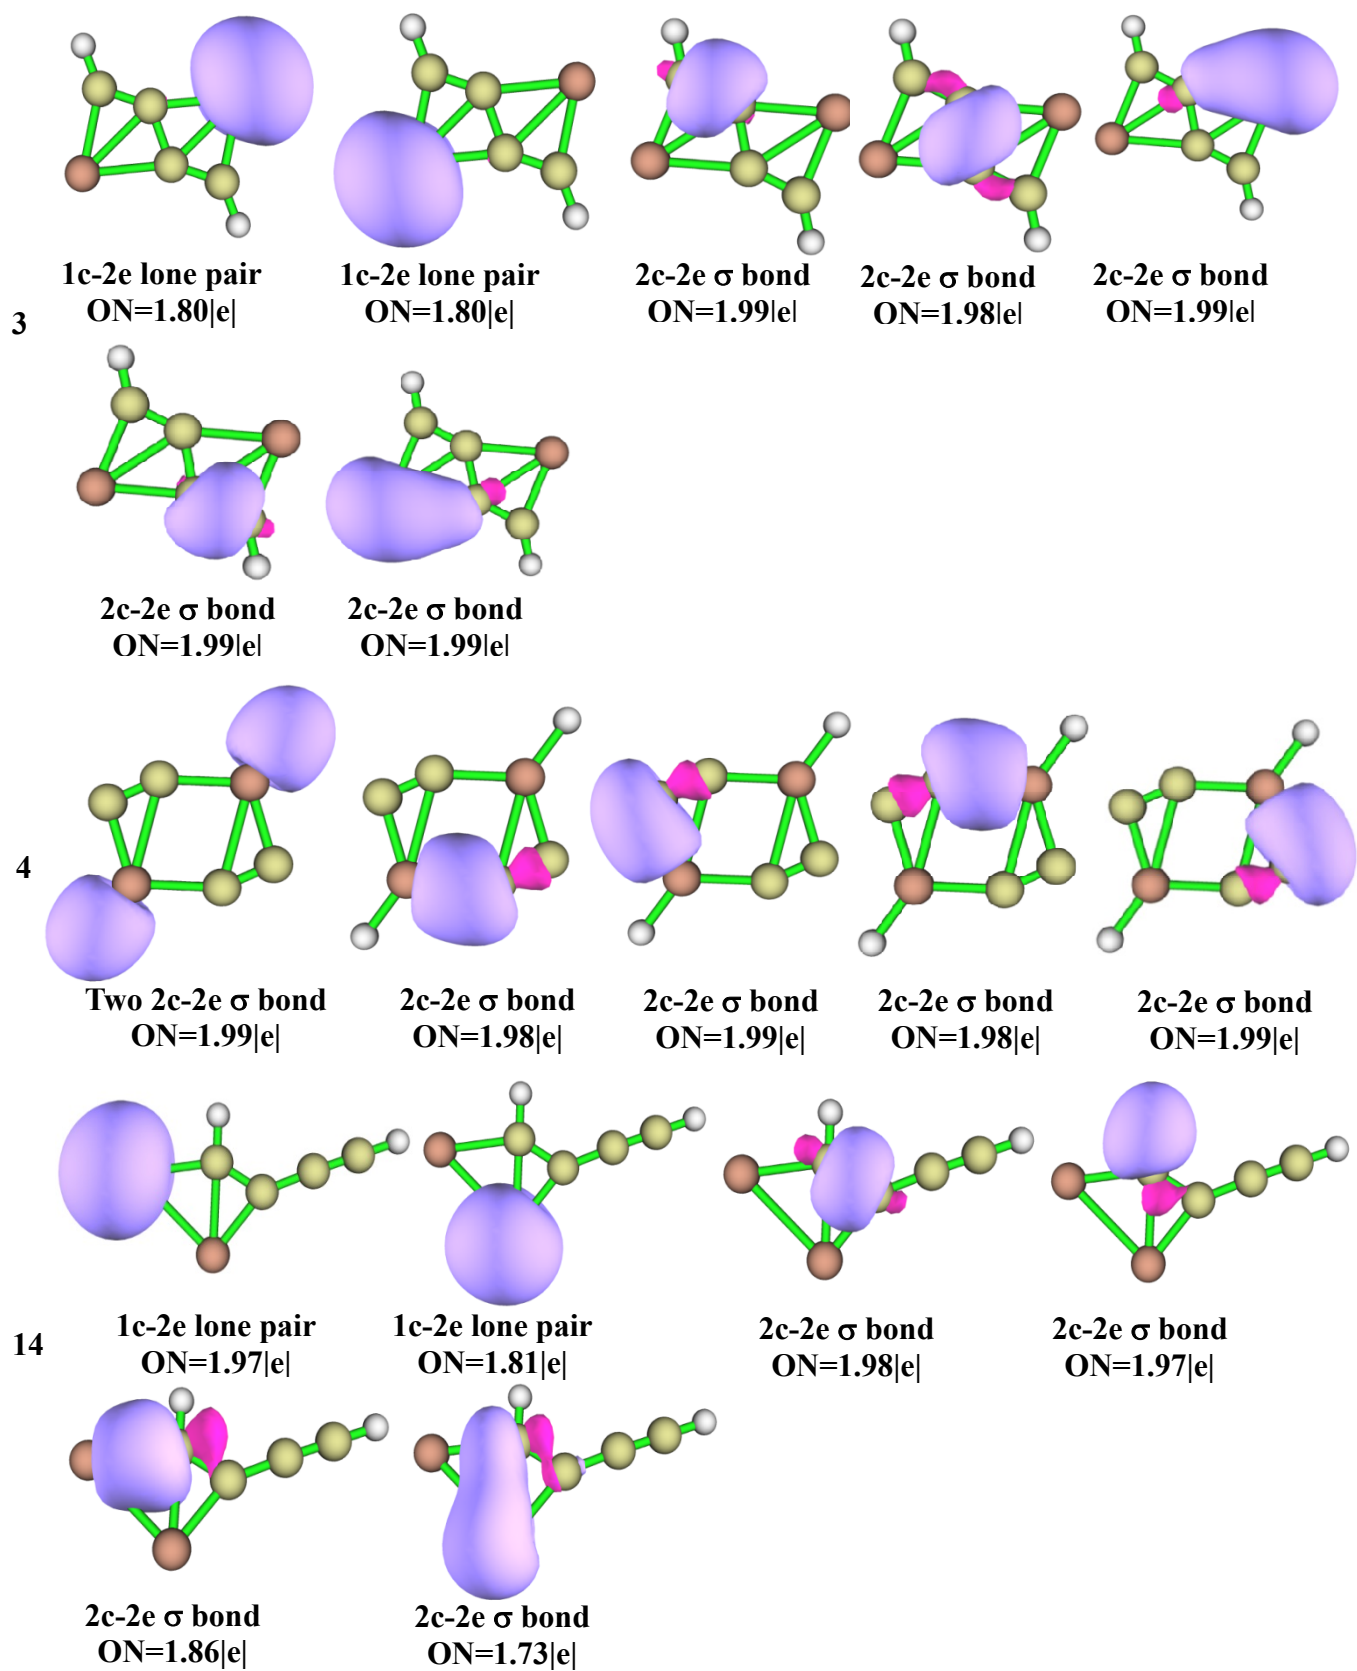

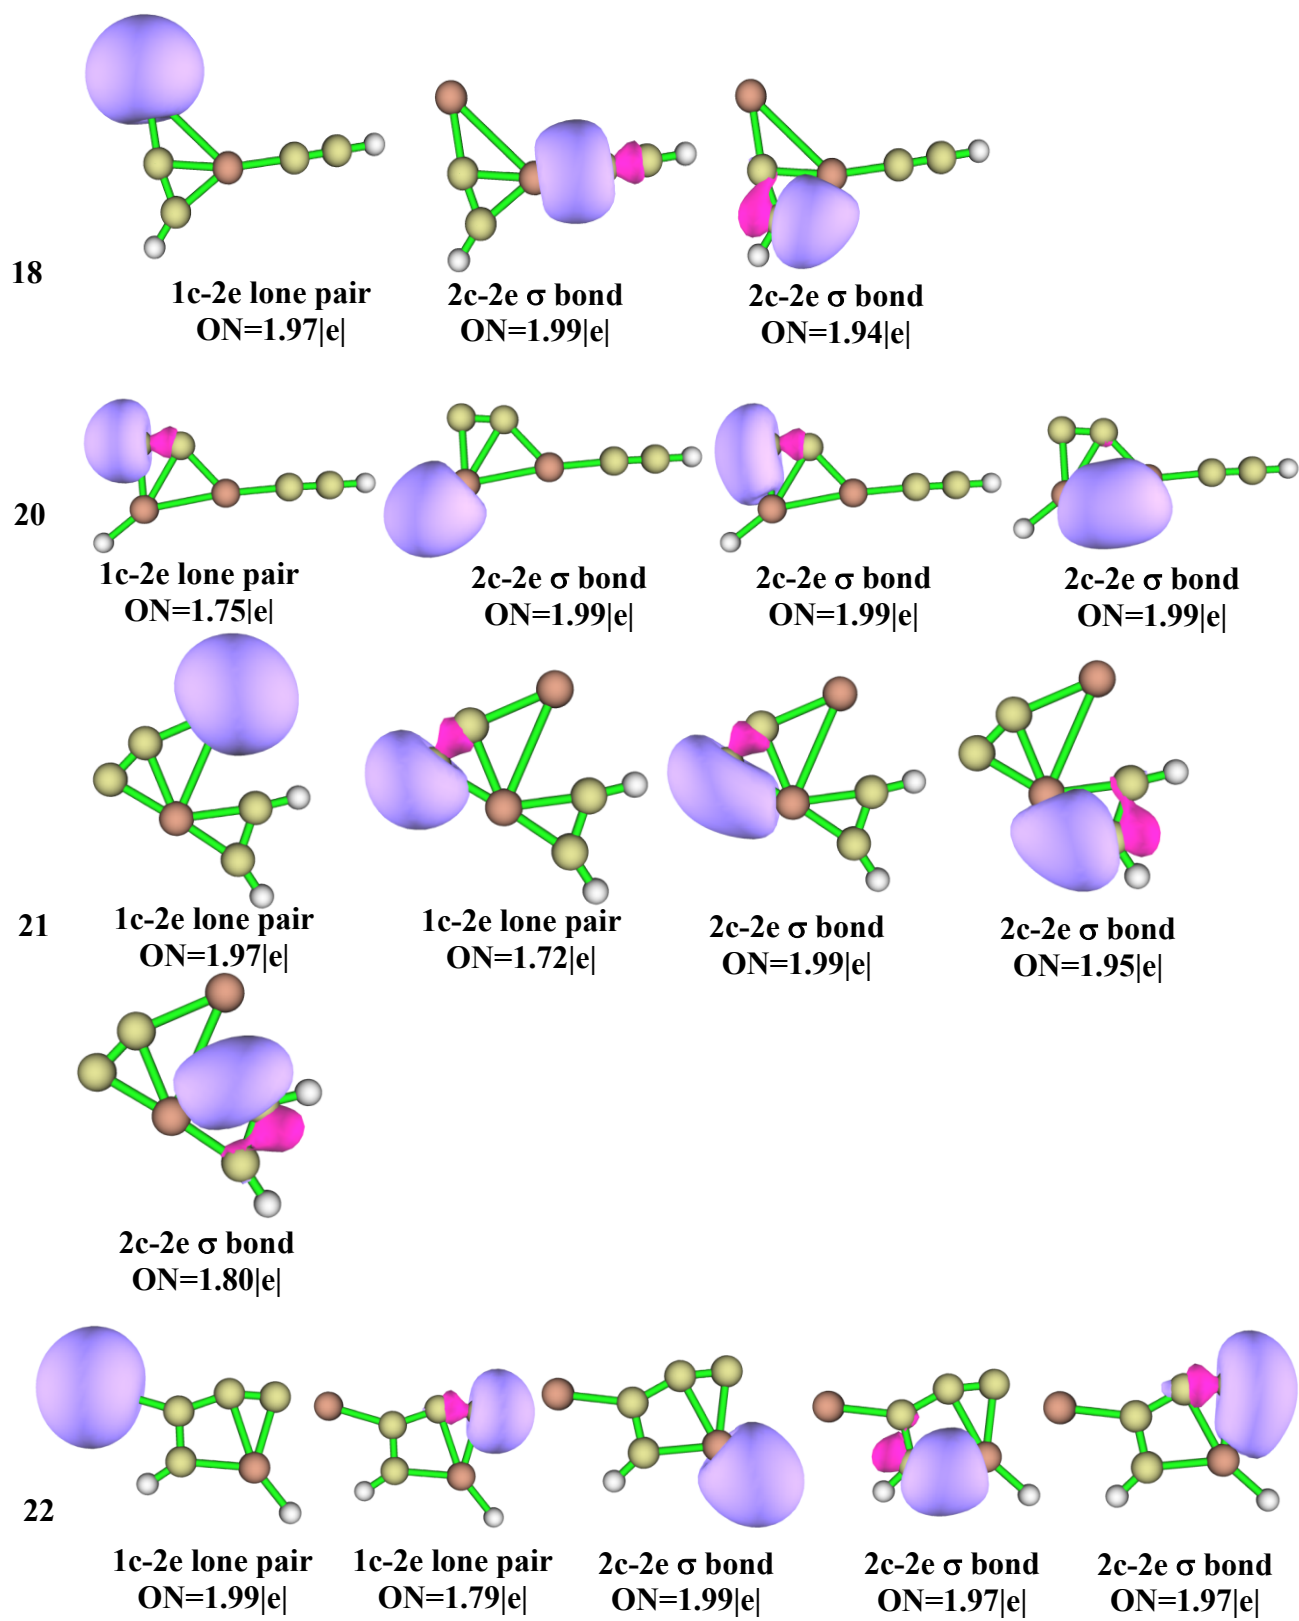



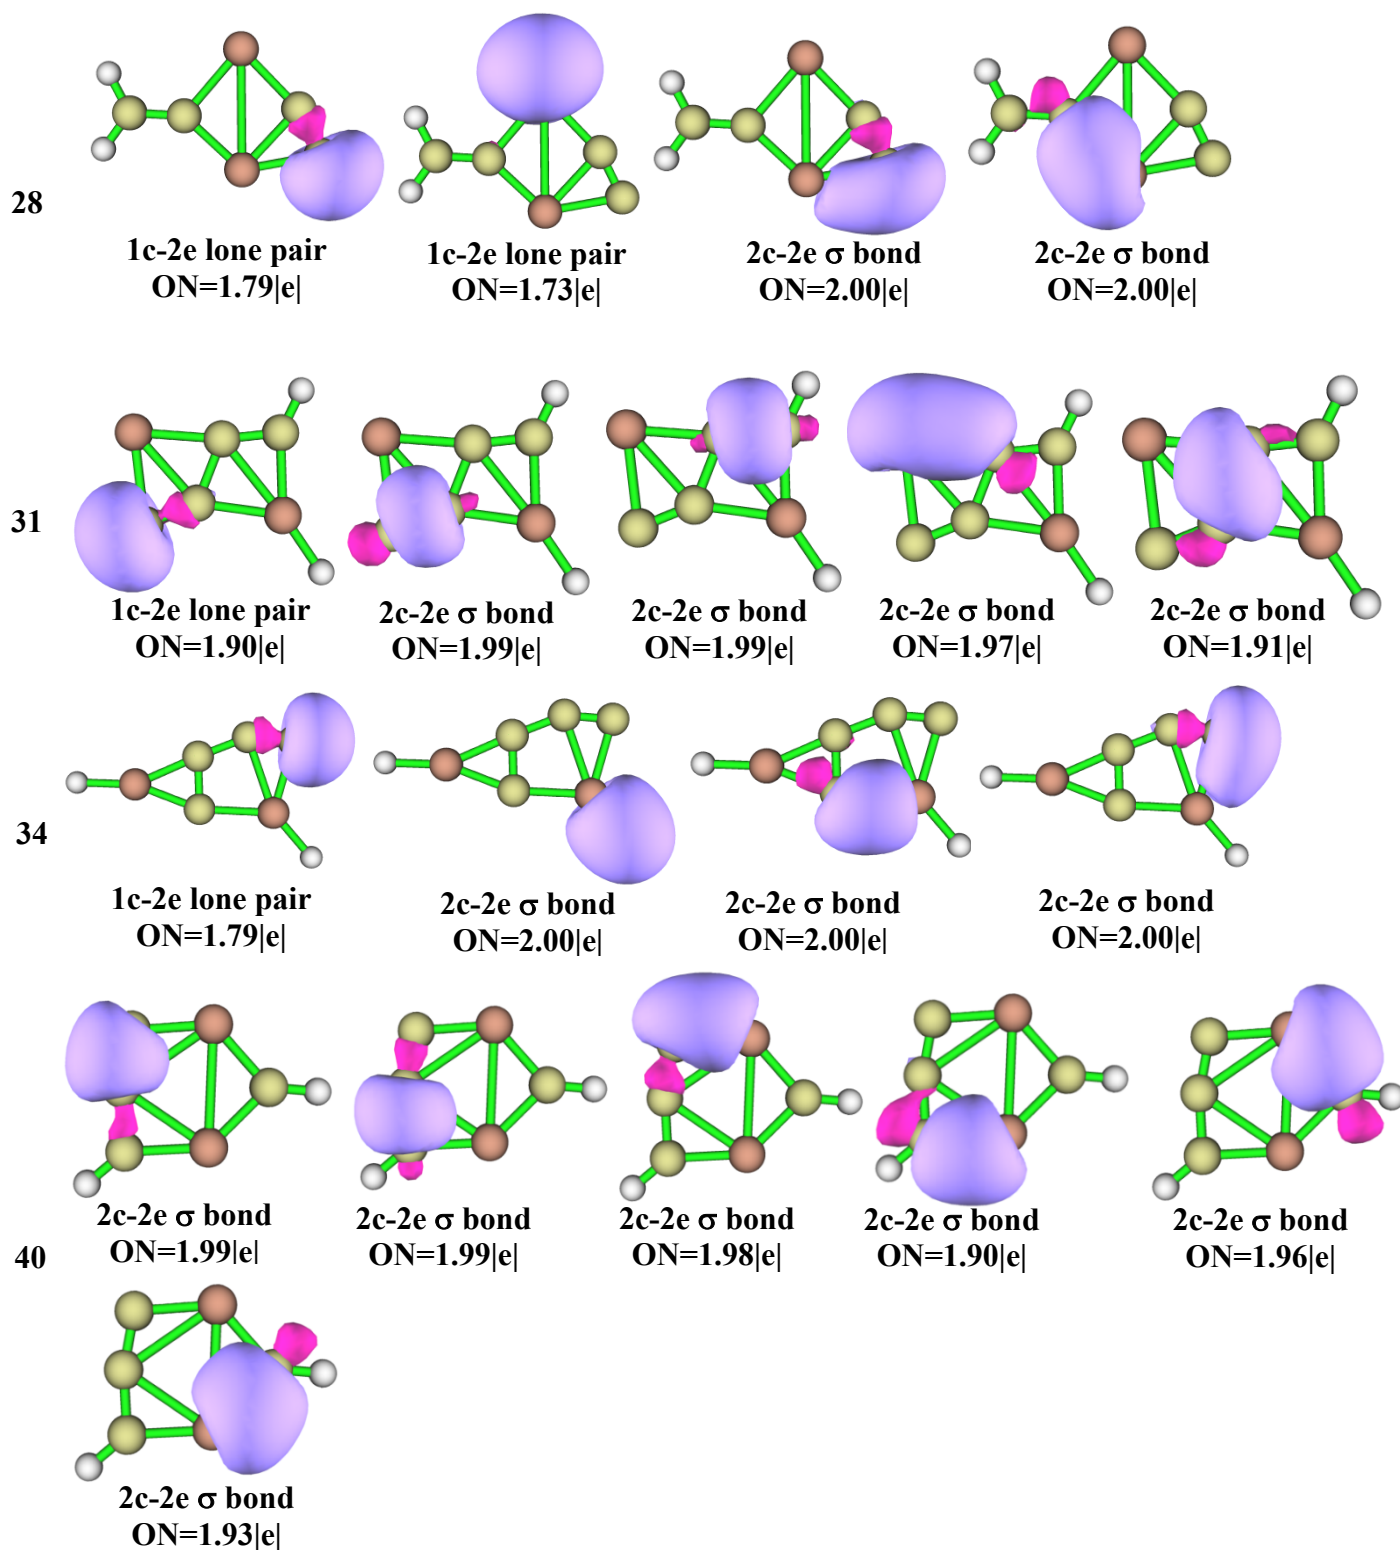

**Figure S2.** Lone pairs and 2c–2e bonds of  $\text{Al}_2\text{C}_4\text{H}_2$  isomers **3**, **4**, **14**, **18**, **20**, **21**, **22**, **28**, **31**, **34**, and **40** from AdNDP analysis at the  $\omega\text{B97XD}/6\text{-}311++\text{G}(2\text{d},2\text{p})$  level of theory

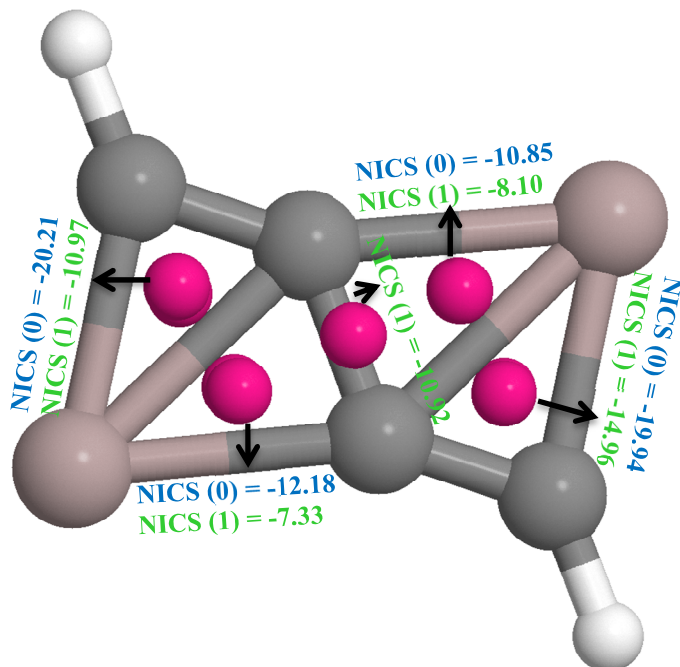

**Figure S3.** Nucleus independent chemical shifts (NICSs; in ppm) for isomer **3** at the  $\omega$ B97XD/6-311++G(2d,2p) level. NICS (1) (green color) is calculated at 1 Å above the ring, whereas NICS(0) (blue color) refers to on the plane values.

**Table S1.** Total energy (in a.u), zero-point vibrational energy (ZPVE; in a.u), ZPVE corrected total energy (E+ZPVE; in a.u), relative energy ( $\Delta E + \text{ZPVE}$ ; in a.u and kcal mol<sup>-1</sup>), and the number of imaginary frequencies (NImag) of various Al<sub>2</sub>C<sub>4</sub>H<sub>2</sub> isomers calculated at  $\omega\text{B97XD/6-311++G(2d,2p)}$  level of theory.

| <b><math>\omega\text{B97XD/6-311++G(2d,2p)}</math></b> |                         |                       |                         |                                                      |                                                                        |              |
|--------------------------------------------------------|-------------------------|-----------------------|-------------------------|------------------------------------------------------|------------------------------------------------------------------------|--------------|
| <b>Isomer</b>                                          | <b>Energy<br/>(a.u)</b> | <b>ZPVE<br/>(a.u)</b> | <b>E+ZPVE<br/>(a.u)</b> | <b><math>\Delta E + \text{ZPVE}</math><br/>(a.u)</b> | <b><math>\Delta E + \text{ZPVE}</math><br/>(kcal mol<sup>-1</sup>)</b> | <b>NImag</b> |
| 1                                                      | -638.33933              | 0.034904              | -638.304485             | 0.00000                                              | 0.0                                                                    | 0            |
| 2                                                      | -638.34577              | 0.041396              | -638.304375             | 0.00011                                              | 0.1                                                                    | 0            |
| 3                                                      | -638.34                 | 0.040721              | -638.299282             | 0.005203                                             | 3.3                                                                    | 0            |
| 4                                                      | -638.32969              | 0.032049              | -638.297641             | 0.006844                                             | 4.3                                                                    | 0            |
| 5                                                      | -638.32823              | 0.031901              | -638.296326             | 0.008159                                             | 5.1                                                                    | 1            |
| 6                                                      | -638.33736              | 0.041124              | -638.29624              | 0.008245                                             | 5.2                                                                    | 0            |
| 7                                                      | -638.33417              | 0.041218              | -638.292953             | 0.011532                                             | 7.2                                                                    | 0            |
| 8                                                      | -638.33256              | 0.041178              | -638.291381             | 0.013104                                             | 8.2                                                                    | 0            |
| 9                                                      | -638.3234               | 0.033296              | -638.290103             | 0.014382                                             | 9.0                                                                    | 0            |
| 10                                                     | -638.32825              | 0.040028              | -638.28822              | 0.016265                                             | 10.2                                                                   | 0            |
| 11                                                     | -638.32642              | 0.039635              | -638.28678              | 0.017705                                             | 11.1                                                                   | 1            |
| 12                                                     | -638.32415              | 0.039332              | -638.28481              | 0.019675                                             | 12.3                                                                   | 0            |
| 13                                                     | -638.31841              | 0.038447              | -638.27997              | 0.024515                                             | 15.4                                                                   | 0            |
| 14                                                     | -638.31741              | 0.039925              | -638.27749              | 0.026995                                             | 16.9                                                                   | 0            |
| 15                                                     | -638.31146              | 0.037145              | -638.27432              | 0.030165                                             | 18.9                                                                   | 0            |
| 16                                                     | -638.31069              | 0.03704               | -638.27365              | 0.030835                                             | 19.3                                                                   | 0            |
| 17                                                     | -638.30849              | 0.037972              | -638.27052              | 0.033965                                             | 21.3                                                                   | 0            |
| 18                                                     | -638.30936              | 0.038876              | -638.27048              | 0.034005                                             | 21.3                                                                   | 0            |
| 19                                                     | -638.30877              | 0.040059              | -638.26871              | 0.035775                                             | 22.4                                                                   | 0            |
| 20                                                     | -638.30298              | 0.034895              | -638.26809              | 0.036395                                             | 22.8                                                                   | 0            |
| 21                                                     | -638.30687              | 0.039162              | -638.26771              | 0.036775                                             | 23.1                                                                   | 0            |
| 22                                                     | -638.30239              | 0.037115              | -638.26527              | 0.039215                                             | 24.6                                                                   | 0            |
| 23                                                     | -638.30095              | 0.038206              | -638.26274              | 0.041745                                             | 26.2                                                                   | 0            |

|    |              |          |             |          |       |   |
|----|--------------|----------|-------------|----------|-------|---|
| 24 | -638.3002906 | 0.040188 | -638.260103 | 0.044382 | 27.9  | 0 |
| 25 | -638.29586   | 0.035974 | -638.25988  | 0.044605 | 28.0  | 0 |
| 26 | -638.29468   | 0.037012 | -638.25767  | 0.046815 | 29.4  | 0 |
| 27 | -638.29248   | 0.036156 | -638.25632  | 0.048165 | 30.2  | 0 |
| 28 | -638.29478   | 0.039585 | -638.2552   | 0.049285 | 30.9  | 0 |
| 29 | -638.28012   | 0.030584 | -638.24954  | 0.054945 | 34.5  | 1 |
| 30 | -638.28222   | 0.032735 | -638.24949  | 0.054995 | 34.5  | 0 |
| 31 | -638.28511   | 0.036001 | -638.24911  | 0.055375 | 34.7  | 0 |
| 32 | -638.28403   | 0.038894 | -638.24513  | 0.059355 | 37.2  | 0 |
| 33 | -638.27218   | 0.030762 | -638.24142  | 0.063065 | 39.6  | 0 |
| 34 | -638.27429   | 0.033607 | -638.24068  | 0.063805 | 40.0  | 0 |
| 35 | -638.27924   | 0.038636 | -638.24061  | 0.063875 | 40.1  | 1 |
| 36 | -638.27216   | 0.03574  | -638.23642  | 0.068065 | 42.7  | 0 |
| 37 | -638.26937   | 0.033958 | -638.23542  | 0.069065 | 43.3  | 0 |
| 38 | -638.27069   | 0.039196 | -638.2315   | 0.072985 | 45.8  | 0 |
| 39 | -638.26371   | 0.033442 | -638.23027  | 0.074215 | 46.6  | 0 |
| 40 | -638.2646625 | 0.039315 | -638.225347 | 0.079138 | 49.7  | 1 |
| 41 | -638.26645   | 0.041203 | -638.22525  | 0.079235 | 49.7  | 0 |
| 42 | -638.2589114 | 0.036795 | -638.22218  | 0.082305 | 51.6  | 0 |
| 43 | -638.25339   | 0.036659 | -638.21673  | 0.087755 | 55.1  | 0 |
| 44 | -638.2413584 | 0.037617 | -638.20374  | 0.100745 | 63.2  | 0 |
| 45 | -638.22934   | 0.03434  | -638.195    | 0.109485 | 68.7  | 0 |
| 46 | -638.21958   | 0.034218 | -638.18536  | 0.119125 | 74.8  | 0 |
| 47 | -638.21013   | 0.030555 | -638.17958  | 0.124905 | 78.4  | 0 |
| 48 | -638.20931   | 0.031457 | -638.17785  | 0.126635 | 79.5  | 0 |
| 49 | -638.19497   | 0.03467  | -638.1603   | 0.144185 | 90.5  | 0 |
| 50 | -638.19081   | 0.038467 | -638.15234  | 0.152145 | 95.5  | 2 |
| 51 | -638.19079   | 0.042244 | -638.14854  | 0.155945 | 97.9  | 0 |
| 52 | -638.18194   | 0.03515  | -638.14679  | 0.157695 | 99.0  | 1 |
| 53 | -638.17247   | 0.034611 | -638.13786  | 0.166625 | 104.6 | 1 |

|           |            |          |            |          |       |   |
|-----------|------------|----------|------------|----------|-------|---|
| <b>54</b> | −638.17174 | 0.03582  | −638.13592 | 0.168565 | 105.8 | 0 |
| <b>55</b> | −638.1702  | 0.037148 | −638.13305 | 0.171435 | 107.6 | 1 |
| <b>56</b> | −638.16674 | 0.03514  | −638.1316  | 0.172885 | 108.5 | 0 |
| <b>57</b> | −638.15491 | 0.03109  | −638.12382 | 0.180665 | 113.4 | 2 |
| <b>58</b> | −638.16675 | 0.043054 | −638.12369 | 0.180795 | 113.5 | 1 |
| <b>59</b> | −638.15393 | 0.034623 | −638.11931 | 0.185175 | 116.2 | 4 |
| <b>60</b> | −638.09798 | 0.035609 | −638.06237 | 0.242115 | 151.9 | 1 |
| <b>61</b> | −638.04949 | 0.032952 | −638.01653 | 0.287955 | 180.7 | 2 |
| <b>62</b> | −637.99394 | 0.028693 | −637.96524 | 0.339245 | 212.9 | 1 |

**Table S2.** Total energy (in a.u), zero-point vibrational energy (ZPVE; in a.u), ZPVE corrected total energy (E+ZPVE; in a.u), relative energy ( $\Delta E + \text{ZPVE}$ ; in a.u and kcal mol<sup>-1</sup>), and the number of imaginary frequencies (NImag) of various Al<sub>2</sub>C<sub>4</sub>H<sub>2</sub> isomers calculated at B3LYP/6-311++G(2d,2p) level of theory.

| <b>B3LYP/6-311++G(2d,2p)</b> |                         |                       |                         |                                                      |                                                                        |              |
|------------------------------|-------------------------|-----------------------|-------------------------|------------------------------------------------------|------------------------------------------------------------------------|--------------|
| <b>Isomer</b>                | <b>Energy<br/>(a.u)</b> | <b>ZPVE<br/>(a.u)</b> | <b>E+ZPVE<br/>(a.u)</b> | <b><math>\Delta E + \text{ZPVE}</math><br/>(a.u)</b> | <b><math>\Delta E + \text{ZPVE}</math><br/>(kcal mol<sup>-1</sup>)</b> | <b>NImag</b> |
| 1                            | -638.46707              | 0.0344                | -638.43267              | 0.00053                                              | 0.3                                                                    | 0            |
| 2                            | -638.47392              | 0.040723              | -638.4332               | 0                                                    | 0.0                                                                    | 0            |
| 3                            | -638.47004              | 0.040297              | -638.42974              | 0.00346                                              | 2.2                                                                    | 0            |
| 4                            | -638.44859              | 0.031694              | -638.4169               | 0.0163                                               | 10                                                                     | 0            |
| 5                            | -638.44816              | 0.031502              | -638.41666              | 0.01654                                              | 10                                                                     | 1            |
| 6                            | -638.46643              | 0.040538              | -638.42589              | 0.00731                                              | 4.6                                                                    | 0            |
| 7                            | -638.46136              | 0.040567              | -638.42079              | 0.01241                                              | 7.8                                                                    | 0            |
| 8                            | -638.4613733            | 0.040555              | -638.420819             | 0.012381                                             | 7.8                                                                    | 0            |
| 9                            | -638.45689              | 0.032815              | -638.42408              | 0.00912                                              | 5.7                                                                    | 0            |
| 10*                          | —                       | —                     | —                       | —                                                    | —                                                                      | —            |
| 11                           | -638.45748              | 0.0392                | -638.41828              | 0.01492                                              | 9.4                                                                    | 0            |
| 12                           | -638.44652              | 0.0386                | -638.40792              | 0.02528                                              | 15.9                                                                   | 0            |
| 13                           | -638.44632              | 0.037859              | -638.40846              | 0.02474                                              | 15.5                                                                   | 0            |
| 14                           | -638.44447              | 0.03905               | -638.40542              | 0.02778                                              | 17.4                                                                   | 0            |
| 15                           | -638.43633              | 0.036413              | -638.39992              | 0.03328                                              | 20.9                                                                   | 0            |
| 16                           | -638.44423              | 0.036521              | -638.40771              | 0.02549                                              | 16.0                                                                   | 0            |
| 17                           | -638.43557              | 0.037451              | -638.39812              | 0.03508                                              | 22.0                                                                   | 0            |
| 18                           | -638.43186              | 0.038165              | -638.39369              | 0.03951                                              | 24.8                                                                   | 0            |
| 19                           | -638.43481              | 0.039372              | -638.39544              | 0.03776                                              | 23.7                                                                   | 0            |
| 20                           | -638.42378              | 0.034366              | -638.38942              | 0.04378                                              | 27.5                                                                   | 0            |
| 21                           | -638.42392              | 0.038278              | -638.38564              | 0.04756                                              | 29.8                                                                   | 0            |
| 22                           | -638.42174              | 0.03635               | -638.38539              | 0.04781                                              | 30.0                                                                   | 0            |
| 23                           | -638.43355              | 0.037795              | -638.39575              | 0.03745                                              | 23.5                                                                   | 0            |

|            |            |          |            |         |      |   |
|------------|------------|----------|------------|---------|------|---|
| <b>24</b>  | −638.42894 | 0.03949  | −638.38945 | 0.04375 | 27.5 | 0 |
| <b>25*</b> | −          | −        | −          | −       | −    | − |
| <b>26</b>  | −638.42785 | 0.036559 | −638.39129 | 0.04191 | 26.3 | 0 |
| <b>27</b>  | −638.41742 | 0.035387 | −638.38204 | 0.05116 | 32.1 | 0 |
| <b>28</b>  | −638.42584 | 0.039124 | −638.38672 | 0.04648 | 29.2 | 0 |
| <b>29</b>  | −638.40242 | 0.030088 | −638.37234 | 0.06086 | 38.2 | 1 |
| <b>30</b>  | −638.40606 | 0.032153 | −638.3739  | 0.0593  | 37.2 | 0 |
| <b>31*</b> | −          | −        | −          | −       | −    | − |
| <b>32</b>  | −638.40482 | 0.038319 | −638.3665  | 0.0667  | 41.9 | 0 |
| <b>33*</b> | −          | −        | −          | −       | −    | − |
| <b>34</b>  | −638.38982 | 0.032735 | −638.35709 | 0.07611 | 47.8 | 0 |
| <b>35</b>  | −638.40038 | 0.03804  | −638.36234 | 0.07086 | 44.5 | 0 |
| <b>36</b>  | −638.38901 | 0.03496  | −638.35405 | 0.07915 | 49.7 | 0 |
| <b>37</b>  | −638.39095 | 0.033363 | −638.35759 | 0.07561 | 47.4 | 0 |
| <b>38</b>  | −638.39066 | 0.038566 | −638.35209 | 0.08111 | 50.9 | 0 |
| <b>39*</b> | −          | −        | −          | −       | −    | − |
| <b>40</b>  | −638.3845  | 0.038687 | −638.34581 | 0.08739 | 54.8 | 1 |
| <b>41</b>  | −638.38608 | 0.040395 | −638.34568 | 0.08752 | 54.9 | 0 |
| <b>42</b>  | −638.37782 | 0.036071 | −638.34175 | 0.09145 | 57.4 | 0 |
| <b>43</b>  | −638.37904 | 0.035622 | −638.34342 | 0.08978 | 56.3 | 0 |
| <b>44</b>  | −638.36209 | 0.0369   | −638.32519 | 0.10801 | 67.8 | 0 |
| <b>45</b>  | −638.36878 | 0.034359 | −638.33442 | 0.09878 | 62.0 | 0 |
| <b>46</b>  | −638.34783 | 0.033576 | −638.31425 | 0.11895 | 74.6 | 0 |
| <b>47</b>  | −638.37091 | 0.030329 | −638.34058 | 0.09262 | 58.1 | 0 |
| <b>48</b>  | −638.33968 | 0.03068  | −638.309   | 0.1242  | 77.9 | 0 |
| <b>49</b>  | −638.3162  | 0.033928 | −638.28228 | 0.15092 | 94.7 | 0 |
| <b>50*</b> | −          | −        | −          | −       | −    | − |
| <b>51*</b> | −          | −        | −          | −       | −    | − |
| <b>52</b>  | −638.31415 | 0.034303 | −638.27985 | 0.15335 | 96.2 | 1 |
| <b>53</b>  | −638.30983 | 0.033706 | −638.27612 | 0.15708 | 98.6 | 1 |

|                       |            |          |            |         |       |   |
|-----------------------|------------|----------|------------|---------|-------|---|
| <b>54</b>             | −638.31897 | 0.035368 | −638.28361 | 0.14959 | 93.9  | 0 |
| <b>55</b>             | −638.31708 | 0.036458 | −638.28062 | 0.15258 | 95.7  | 1 |
| <b>56</b>             | −638.28788 | 0.034582 | −638.2533  | 0.1799  | 112.9 | 0 |
| <b>57<sup>*</sup></b> | —          | —        | —          | —       | —     | — |
| <b>58<sup>*</sup></b> | —          | —        | —          | —       | —     | — |
| <b>59</b>             | −638.28315 | 0.037009 | −638.24614 | 0.18706 | 117.4 | 3 |
| <b>60<sup>*</sup></b> | —          | —        | —          | —       | —     | — |
| <b>61<sup>*</sup></b> | —          | —        | —          | —       | —     | — |
| <b>62</b>             | −638.1255  | 0.028082 | −638.09742 | 0.33578 | 210.7 | 1 |

The isomers marked with \* are not converged at B3LYP/6-311++G(2d,2p) level of theory.



**Table S3.** Natural atomic charges of hydrogen in isomers **3**, **4**, **14**, **18**, **20**, **21**, **22**, **28**, **31**, **34**, and **40** from NBO analysis at the  $\omega$ B97XD/6-311++G(2d,2p) level of theory

| Isomers   | Atomic charge of H (when Al–H)<br> e | Atomic charge of H (when C–H)<br> e |
|-----------|--------------------------------------|-------------------------------------|
| <b>3</b>  | –                                    | 0.232 (H7, H8)                      |
| <b>4</b>  | –0.365 (H7, H8)                      | –                                   |
| <b>14</b> | –                                    | 0.231 (H7), 0.235 (H8)              |
| <b>18</b> | –                                    | 0.214 (H2), 0.228 (H8)              |
| <b>20</b> | –0.347 (H8)                          | 0.227 (H3)                          |
| <b>21</b> | –                                    | 0.213 (H1), 0.215 (H7)              |
| <b>22</b> | –0.373 (H8)                          | 0.195 (H7)                          |
| <b>28</b> | –0.345 (H8)                          | 0.205 (H7), 0.201 (H8)              |
| <b>31</b> | –                                    | 0.234 (H3)                          |
| <b>34</b> | –0.378 (H7), –0.333 (H8)             | –                                   |
| <b>40</b> | –                                    | 0.257 (H7), 0.242 (H8)              |

**Table S4.** The hyper conjugative interaction between the donor  $\rightarrow$  acceptor orbitals of lone pair of aluminum in the isomers **3**, **4**, **18**, **21**, **22**, **28**, and **31** as determined by NBO analysis at  $\omega$ B97XD/6-311++G(2d,2p) level of theory.

| <b>Isomers</b> | <b>Donor<br/>NBO (<i>i</i>)</b> | <b>Acceptor<br/>NBO (<i>j</i>)</b> | <b><math>E^{(2)}</math><br/>(kcal/mol)</b> | <b><math>E(j)-E(i)</math><br/>(a.u)</b> | <b><math>F(i,j)</math><br/>(a.u)</b> |
|----------------|---------------------------------|------------------------------------|--------------------------------------------|-----------------------------------------|--------------------------------------|
| <b>3</b>       | LPA15                           | $\pi^*(C1-C4)$                     | 36.71                                      | 0.20                                    | 0.092                                |
|                | LPA16                           | $\pi^*(C1-C4)$                     | 36.71                                      | 0.20                                    | 0.092                                |
| <b>4</b>       | LPA14                           | LP2*Al5                            | 9.11                                       | 0.50                                    | 0.062                                |
|                | LPA15                           | $\sigma^*(C1-Al4)$                 | 9.50                                       | 0.55                                    | 0.067                                |
| <b>18</b>      | LPA13                           | $\sigma^*(C4-C5)$                  | 15.29                                      | 1.03                                    | 0.112                                |
| <b>21</b>      | LPA15                           | $\sigma^*(C2-C8)$                  | 6.94                                       | 1.21                                    | 0.082                                |
| <b>22</b>      | LPA15                           | $\sigma^*(C1-C4)$                  | 3.43                                       | 0.93                                    | 0.051                                |
| <b>28</b>      | LPA12                           | $\sigma^*(C1-C5)$                  | 6.54                                       | 1.15                                    | 0.083                                |
| <b>31</b>      | LPA15                           | $\sigma^*(C2-C7)$                  | 35.04                                      | 0.40                                    | 0.108                                |

**Table S5.** Occupancies of lone pairs for isomers **3**, **14**, **18**, **21**, **22**, **28**, **31**, and **40** from NBO analysis at  $\omega$ B97XD/6-311++G(2d,2p) level of theory.

| Isomers   | Atom | Type of orbital | Occupancy | %s    | %p    | %d   | NBO Hybrids        |
|-----------|------|-----------------|-----------|-------|-------|------|--------------------|
| <b>3</b>  | Al5  | LP              | 1.75      | 83.96 | 15.97 | 0.07 | sp <sup>0.19</sup> |
|           | Al6  | LP              | 1.75      | 83.96 | 15.97 | 0.07 | sp <sup>0.19</sup> |
| <b>14</b> | Al4  | LP              | 1.98      | 93.88 | 6.10  | 0.02 | sp <sup>0.06</sup> |
|           | Al5  | LP              | 1.81      | 86.50 | 13.41 | 0.08 | sp <sup>0.16</sup> |
| <b>18</b> | Al3  | LP              | 1.97      | 91.22 | 8.77  | 0.01 | sp <sup>0.10</sup> |
|           | C4   | LP              | 1.78      | 47.64 | 51.74 | 0.62 | sp <sup>1.09</sup> |
| <b>21</b> | Al5  | LP              | 1.97      | 90.12 | 9.84  | 0.04 | sp <sup>0.11</sup> |
| <b>22</b> | Al5  | LP              | 1.99      | 92.48 | 7.50  | 0.02 | sp <sup>0.08</sup> |
| <b>28</b> | C1   | LP              | 1.71      | 44.7  | 54.91 | 0.33 | sp <sup>1.23</sup> |
|           | Al2  | LP              | 1.72      | 81.25 | 18.70 | 0.05 | sp <sup>0.23</sup> |
|           | C5   | LP              | 1.78      | 56.16 | 43.48 | 0.36 | sp <sup>0.77</sup> |
| <b>31</b> | C1   | LP              | 1.65      | 35.67 | 64.07 | 0.26 | sp <sup>1.80</sup> |
|           | Al5  | LP              | 1.68      | 93.11 | 6.87  | 0.02 | sp <sup>0.07</sup> |
|           | C7   | LP              | 1.90      | 59.90 | 39.90 | 0.20 | sp <sup>0.67</sup> |
| <b>40</b> | C3   | LP              | 1.42      | 0.00  | 99.65 | 0.35 | sp <sup>1.00</sup> |

**Table S6.** Optimized geometries of Al<sub>2</sub>C<sub>4</sub>H<sub>2</sub> isomers in Cartesian coordinates (in Angström units) obtained at ωB97XD/6-311++G(2d,2p) level of theory.

| 1  |           |           |          |
|----|-----------|-----------|----------|
| C  | -3.520857 | -1.225198 | 0.000000 |
| H  | -1.691932 | 2.482479  | 0.000000 |
| H  | -4.280181 | -1.971133 | 0.000000 |
| C  | -2.656364 | -0.383474 | 0.000000 |
| C  | 0.519537  | 0.414710  | 0.000000 |
| C  | 1.696329  | 0.083340  | 0.000000 |
| Al | -1.307605 | 0.960963  | 0.000000 |
| Al | 3.585438  | -0.494003 | 0.000000 |
| 2  |           |           |          |
| C  | 0.788995  | -0.675549 | 0.000000 |
| C  | -0.457850 | -0.836448 | 0.000000 |
| C  | -1.665862 | -0.149781 | 0.000000 |
| C  | -2.953913 | -0.455652 | 0.000000 |
| Al | 2.716653  | -0.248716 | 0.000000 |
| Al | -0.198451 | 1.317679  | 0.000000 |
| H  | -3.302569 | -1.481886 | 0.000000 |
| H  | -3.704952 | 0.322979  | 0.000000 |
| 3  |           |           |          |
| C  | -0.129653 | 0.713772  | 0.000000 |
| C  | 1.284955  | -1.318563 | 0.000000 |
| C  | -1.284955 | 1.318563  | 0.000000 |
| C  | 0.129653  | -0.713772 | 0.000000 |
| Al | 2.030791  | 0.541047  | 0.000000 |
| Al | -2.030791 | -0.541047 | 0.000000 |
| H  | 1.497900  | -2.372993 | 0.000000 |
| H  | -1.497900 | 2.372993  | 0.000000 |

---

**4**

---

|    |           |           |          |
|----|-----------|-----------|----------|
| C  | -0.317990 | 1.357600  | 0.000000 |
| C  | 1.537320  | -1.160640 | 0.000000 |
| C  | -1.537320 | 1.160640  | 0.000000 |
| C  | 0.317990  | -1.357600 | 0.000000 |
| Al | 1.537320  | 0.747620  | 0.000000 |
| Al | -1.537320 | -0.747620 | 0.000000 |
| H  | 2.759740  | 1.723170  | 0.000000 |
| H  | -2.759740 | -1.723170 | 0.000000 |

---

---

**5**

---

|    |           |           |          |
|----|-----------|-----------|----------|
| C  | -1.505283 | 0.612659  | 0.000000 |
| C  | -1.505283 | -0.612659 | 0.000000 |
| Al | 0.000000  | 1.808016  | 0.000000 |
| C  | 1.505283  | 0.612659  | 0.000000 |
| C  | 1.505283  | -0.612659 | 0.000000 |
| Al | 0.000000  | -1.808016 | 0.000000 |
| H  | 0.000000  | -3.371889 | 0.000000 |
| H  | 0.000000  | 3.371889  | 0.000000 |

---

---

**6**

---

|    |           |           |          |
|----|-----------|-----------|----------|
| C  | -1.417980 | 0.041849  | 0.000000 |
| C  | -0.219983 | 0.285780  | 0.000000 |
| C  | 1.188975  | 0.419431  | 0.000000 |
| C  | 1.811170  | 1.607366  | 0.000000 |
| Al | -3.347575 | -0.233691 | 0.000000 |
| Al | 2.382389  | -1.200057 | 0.000000 |
| H  | 2.897185  | 1.672513  | 0.000000 |
| H  | 1.283895  | 2.556438  | 0.000000 |

---

---

**7**

---

|    |           |           |          |
|----|-----------|-----------|----------|
| C  | -2.229249 | 0.582887  | 0.000000 |
| C  | -1.155021 | 1.390865  | 0.000000 |
| C  | 0.176182  | 0.862253  | 0.000000 |
| C  | 1.297811  | 0.383395  | 0.000000 |
| Al | -1.893530 | -1.402756 | 0.000000 |
| Al | 3.115174  | -0.357419 | 0.000000 |
| H  | -3.193081 | 1.089908  | 0.000000 |
| H  | -1.226629 | 2.475963  | 0.000000 |

---

**8**

---

|    |           |           |          |
|----|-----------|-----------|----------|
| C  | -0.786055 | 0.425835  | 0.000000 |
| C  | 0.628616  | 0.252494  | 0.000000 |
| C  | 1.839562  | 0.117002  | 0.000000 |
| Al | 3.785123  | -0.101752 | 0.000000 |
| C  | -1.692237 | -0.569304 | 0.000000 |
| Al | -3.591362 | 0.029077  | 0.000000 |
| H  | -1.284476 | -1.578802 | 0.000000 |
| H  | -1.104971 | 1.470009  | 0.000000 |

---

**9**

---

|    |          |           |           |
|----|----------|-----------|-----------|
| C  | 0.000000 | 0.000000  | -1.741228 |
| C  | 0.000000 | 0.000000  | -0.525991 |
| C  | 0.000000 | 0.000000  | 0.842420  |
| C  | 0.000000 | 0.000000  | 2.061850  |
| Al | 0.000000 | 0.000000  | 4.033474  |
| Al | 0.000000 | 0.000000  | -3.650255 |
| H  | 0.000000 | 1.383574  | -4.402073 |
| H  | 0.000000 | -1.383574 | -4.402073 |

---

**10**

---

|    |           |           |          |
|----|-----------|-----------|----------|
| C  | 2.355644  | 0.228058  | 0.000000 |
| C  | 1.302557  | 0.980249  | 0.000000 |
| C  | -0.036991 | 0.914535  | 0.000000 |
| C  | -1.302837 | 1.251099  | 0.000000 |
| Al | -2.166939 | -0.571524 | 0.000000 |
| H  | -1.609869 | 2.291684  | 0.000000 |
| Al | 0.957244  | -1.197745 | 0.000000 |
| H  | 3.405740  | 0.460629  | 0.000000 |

---

**11**

---

|    |          |           |           |
|----|----------|-----------|-----------|
| C  | 0.000000 | 1.927103  | 0.910773  |
| C  | 0.000000 | 0.649013  | 1.145972  |
| C  | 0.000000 | -0.649013 | 1.145972  |
| C  | 0.000000 | -1.927103 | 0.910773  |
| Al | 0.000000 | 1.637741  | -1.077904 |
| Al | 0.000000 | -1.637741 | -1.077904 |
| H  | 0.000000 | -2.699200 | 1.667486  |
| H  | 0.000000 | 2.699200  | 1.667486  |

---

---

**12**

---

|    |          |           |           |
|----|----------|-----------|-----------|
| H  | 0.000000 | 1.341644  | -3.934316 |
| H  | 0.000000 | -1.341644 | -3.934316 |
| C  | 0.000000 | 0.684947  | -3.069753 |
| C  | 0.000000 | -0.684947 | -3.069753 |
| Al | 0.000000 | 0.000000  | -1.355859 |
| C  | 0.000000 | 0.000000  | 0.533290  |
| Al | 0.000000 | 0.000000  | 3.738827  |
| C  | 0.000000 | 0.000000  | 1.754554  |

---

---

**13**

---

|    |           |           |          |
|----|-----------|-----------|----------|
| H  | 2.969085  | 1.760585  | 0.000000 |
| C  | -2.385535 | -0.004871 | 0.000000 |
| C  | -3.591545 | 0.032295  | 0.000000 |
| H  | -4.655115 | 0.076920  | 0.000000 |
| C  | 2.109447  | 1.113646  | 0.000000 |
| C  | 0.837527  | 1.159896  | 0.000000 |
| Al | 2.025861  | -0.973924 | 0.000000 |
| Al | -0.499512 | -0.222923 | 0.000000 |

---

---

**14**

---

|    |           |           |          |
|----|-----------|-----------|----------|
| C  | 0.649658  | 0.342177  | 0.000000 |
| C  | -0.110352 | -0.776373 | 0.000000 |
| C  | 0.299561  | -2.119803 | 0.000000 |
| Al | 0.515788  | 2.445493  | 0.000000 |
| Al | -1.502456 | 0.566695  | 0.000000 |
| C  | 0.602209  | -3.283429 | 0.000000 |
| H  | 0.848719  | -4.316767 | 0.000000 |
| H  | 1.745422  | 0.240141  | 0.000000 |

---

---

**15**

---

|    |           |           |          |
|----|-----------|-----------|----------|
| H  | -1.584837 | 2.176653  | 0.000000 |
| H  | -3.980265 | -1.471882 | 0.000000 |
| Al | -2.776079 | -0.476960 | 0.000000 |
| C  | -1.864811 | 1.128603  | 0.000000 |
| C  | -0.992804 | 0.063863  | 0.000000 |
| C  | 0.410457  | 0.031872  | 0.000000 |
| Al | 3.578780  | -0.114218 | 0.000000 |
| C  | 1.629872  | -0.034750 | 0.000000 |

---

---

**16**

---

|    |           |           |          |
|----|-----------|-----------|----------|
| Al | 0.000000  | -1.546777 | 0.000000 |
| H  | -3.779689 | 0.000000  | 0.000000 |
| C  | 1.494719  | 0.000000  | 0.000000 |
| Al | 0.000000  | 1.546777  | 0.000000 |
| C  | -2.713894 | 0.000000  | 0.000000 |
| C  | 2.713894  | 0.000000  | 0.000000 |
| C  | -1.494719 | 0.000000  | 0.000000 |
| H  | 3.779689  | 0.000000  | 0.000000 |

---

---

**17**

---

|    |          |           |           |
|----|----------|-----------|-----------|
| C  | 0.000000 | 2.689047  | 1.608824  |
| H  | 0.000000 | 3.628058  | 2.109842  |
| C  | 0.000000 | 1.613765  | 1.056533  |
| C  | 0.000000 | -1.613765 | 1.056533  |
| C  | 0.000000 | -2.689047 | 1.608824  |
| Al | 0.000000 | 0.000000  | 0.005653  |
| H  | 0.000000 | -3.628058 | 2.109842  |
| Al | 0.000000 | 0.000000  | -2.758925 |

---

---

**18**

---

|    |           |           |           |
|----|-----------|-----------|-----------|
| C  | -0.784200 | 1.742701  | 0.003344  |
| H  | -1.197963 | 2.746151  | 0.005164  |
| Al | -2.167835 | -1.211163 | -0.001608 |
| C  | -1.495098 | 0.593859  | 0.001335  |
| Al | 0.434536  | 0.338227  | 0.002387  |
| C  | 2.216161  | -0.258882 | 0.002222  |
| C  | 3.349976  | -0.667121 | 0.001891  |
| H  | 4.352075  | -1.026199 | 0.001628  |

---

---

**19**

---

|    |           |           |          |
|----|-----------|-----------|----------|
| H  | -3.897751 | -0.772962 | 0.000000 |
| H  | 0.179646  | -1.946888 | 0.000000 |
| C  | -1.636248 | -0.873978 | 0.000000 |
| C  | 0.605714  | 0.179495  | 0.000000 |
| C  | -2.836195 | -0.822004 | 0.000000 |
| C  | -0.199409 | -0.910724 | 0.000000 |
| Al | 2.414691  | -0.650284 | 0.000000 |
| Al | -0.249399 | 1.981711  | 0.000000 |

---



---

**20**

---

|    |           |           |          |
|----|-----------|-----------|----------|
| C  | 2.360644  | -0.041733 | 0.000000 |
| C  | 3.566127  | 0.000599  | 0.000000 |
| H  | 4.629791  | 0.046050  | 0.000000 |
| C  | -2.127275 | 1.228853  | 0.000000 |
| C  | -0.872604 | 1.179835  | 0.000000 |
| Al | -1.940235 | -0.724272 | 0.000000 |
| Al | 0.475011  | -0.221131 | 0.000000 |
| H  | -3.150333 | -1.721443 | 0.000000 |

---

---

**21**

---

|    |           |           |          |
|----|-----------|-----------|----------|
| C  | -0.641659 | 0.180390  | 0.000000 |
| C  | -0.116857 | -1.081260 | 0.000000 |
| C  | 1.680473  | 1.432419  | 0.000000 |
| C  | 0.485298  | 1.094932  | 0.000000 |
| Al | -2.633998 | 0.057312  | 0.000000 |
| Al | 1.801752  | -0.551475 | 0.000000 |
| H  | -0.762985 | -1.961112 | 0.000000 |
| H  | 3.138645  | -1.373654 | 0.000000 |

---

---

**22**

---

|    |          |           |           |
|----|----------|-----------|-----------|
| C  | 0.000000 | -1.578124 | 0.652744  |
| C  | 0.000000 | -0.962094 | -0.463496 |
| H  | 0.000000 | 2.619385  | 0.922873  |
| H  | 0.000000 | -2.619385 | 0.922873  |
| Al | 0.000000 | 0.000000  | 1.919041  |
| C  | 0.000000 | 1.578124  | 0.652744  |
| C  | 0.000000 | 0.962094  | -0.463496 |
| Al | 0.000000 | 0.000000  | -2.235711 |

---

---

**23**

---

|    |           |           |           |
|----|-----------|-----------|-----------|
| H  | 3.102346  | -0.891848 | -0.594409 |
| H  | 0.557717  | 2.386896  | 0.708643  |
| C  | 1.664681  | 0.751848  | -0.206376 |
| C  | -0.649770 | 0.698848  | 0.022413  |
| C  | 2.246373  | -0.360715 | -0.231568 |
| C  | 0.471000  | 1.434719  | 0.191564  |
| Al | -2.339748 | -0.156323 | -0.195461 |
| Al | 0.358016  | -1.098674 | 0.293256  |

---

---

**24**

---

|    |          |           |           |
|----|----------|-----------|-----------|
| C  | 0.000000 | 0.685581  | 1.501577  |
| C  | 0.000000 | -0.685581 | 1.501577  |
| H  | 0.000000 | 2.457944  | -2.085703 |
| C  | 0.000000 | 1.779900  | 0.935788  |
| C  | 0.000000 | -1.779900 | 0.935788  |
| Al | 0.000000 | 1.343948  | -0.964499 |
| Al | 0.000000 | -1.343948 | -0.964499 |
| H  | 0.000000 | -2.457944 | -2.085703 |

---

---

**25**

---

|    |           |           |           |
|----|-----------|-----------|-----------|
| C  | 0.894727  | 0.109772  | 0.010032  |
| C  | -0.389035 | 0.173549  | 0.007343  |
| C  | -1.453061 | 1.076071  | 0.014263  |
| H  | -3.239721 | 2.464458  | 0.023865  |
| Al | 2.163806  | -1.301413 | -0.005077 |
| Al | -0.406074 | -1.910939 | -0.020046 |
| C  | -2.404924 | 1.807955  | 0.020033  |
| H  | 3.735098  | -1.228481 | -0.000366 |

---

---

**26**

---

|    |           |           |          |
|----|-----------|-----------|----------|
| Al | 1.078123  | 0.861971  | 0.000000 |
| C  | 2.828138  | 0.022861  | 0.000000 |
| C  | 3.972929  | -0.369394 | 0.000000 |
| Al | -1.078123 | -0.861971 | 0.000000 |
| C  | -2.828138 | -0.022861 | 0.000000 |
| C  | -3.972929 | 0.369394  | 0.000000 |
| H  | -4.975852 | 0.726435  | 0.000000 |
| H  | 4.975852  | -0.726435 | 0.000000 |

---

**27**

---

|    |           |           |          |
|----|-----------|-----------|----------|
| Al | -0.949004 | 1.157641  | 0.000000 |
| H  | -1.760722 | 2.489812  | 0.000000 |
| Al | -1.859246 | -1.808679 | 0.000000 |
| C  | -0.308803 | -0.673776 | 0.000000 |
| C  | 0.687628  | 0.252103  | 0.000000 |
| C  | 2.083638  | 0.080866  | 0.000000 |
| C  | 3.281606  | -0.010466 | 0.000000 |
| H  | 4.339885  | -0.100489 | 0.000000 |

---

**28**

---

|    |           |           |          |
|----|-----------|-----------|----------|
| C  | 1.518707  | 0.682544  | 0.000000 |
| Al | -0.143990 | 1.829768  | 0.000000 |
| C  | -1.176426 | -0.035850 | 0.000000 |
| C  | -2.485689 | -0.227908 | 0.000000 |
| C  | 2.281352  | -0.318863 | 0.000000 |
| Al | 0.459866  | -1.041123 | 0.000000 |
| H  | -3.173550 | 0.612472  | 0.000000 |
| H  | -2.936320 | -1.214384 | 0.000000 |

---

**29**

---

|    |          |           |           |
|----|----------|-----------|-----------|
| C  | 0.000000 | 0.631648  | -3.408267 |
| C  | 0.000000 | -0.631648 | -3.408267 |
| C  | 0.000000 | 0.000000  | 0.230510  |
| C  | 0.000000 | 0.000000  | 1.447156  |
| Al | 0.000000 | 0.000000  | -1.640103 |
| Al | 0.000000 | 0.000000  | 3.380267  |
| H  | 0.000000 | 1.393129  | 4.105539  |
| H  | 0.000000 | -1.393129 | 4.105539  |

---

**30**

---

|    |           |           |           |
|----|-----------|-----------|-----------|
| H  | 0.009499  | 1.597575  | 0.848412  |
| C  | -0.000621 | -0.421965 | -3.236954 |
| Al | -0.005515 | -0.027756 | 3.220763  |
| C  | 0.007231  | 0.806437  | -2.945846 |
| C  | 0.001536  | 0.614413  | 1.318605  |
| C  | -0.005837 | -0.483311 | 0.531643  |
| Al | -0.001774 | -0.221349 | -1.363989 |
| H  | -0.013875 | -1.475261 | 0.999972  |

---

**31**

---

|    |           |           |          |
|----|-----------|-----------|----------|
| C  | 0.318519  | 0.335128  | 0.000000 |
| C  | -1.187951 | -0.113131 | 0.000000 |
| H  | 2.303954  | -0.423009 | 0.000000 |
| C  | 1.248120  | -0.638106 | 0.000000 |
| Al | -0.796668 | 2.017858  | 0.000000 |
| Al | -0.205295 | -1.830644 | 0.000000 |
| C  | -2.309899 | 0.533332  | 0.000000 |
| H  | -0.692471 | -3.318059 | 0.000000 |

---

---

**32**

---

|    |           |           |          |
|----|-----------|-----------|----------|
| C  | 0.222283  | 0.685324  | 0.000000 |
| C  | 1.344472  | 1.426924  | 0.000000 |
| C  | -0.512903 | -2.945290 | 0.000000 |
| Al | 0.236166  | -1.213497 | 0.000000 |
| Al | -1.182067 | 2.122935  | 0.000000 |
| C  | 0.746525  | -3.031133 | 0.000000 |
| H  | 1.320790  | 2.528591  | 0.000000 |
| H  | 2.363300  | 1.044129  | 0.000000 |

---

---

**33**

---

|    |           |           |           |
|----|-----------|-----------|-----------|
| C  | -0.021311 | 2.434485  | 0.002279  |
| C  | 1.131790  | -2.957194 | -0.027816 |
| C  | -0.376267 | 1.265144  | 0.008699  |
| C  | 0.461287  | -1.884421 | -0.011955 |
| H  | 1.610621  | -1.623979 | -0.035133 |
| Al | -0.928269 | -0.554000 | 0.018705  |
| Al | 0.545407  | 4.336771  | -0.004558 |
| H  | -2.423257 | -1.016804 | 0.049780  |

---

---

**34**

---

|    |           |           |           |
|----|-----------|-----------|-----------|
| C  | 0.534683  | -0.683805 | 0.001732  |
| C  | 0.494714  | 0.727905  | -0.003029 |
| C  | -2.039387 | -1.096101 | -0.002102 |
| C  | -0.800267 | -1.201623 | 0.001331  |
| Al | -1.487846 | 0.822768  | 0.000326  |
| Al | 2.225173  | 0.061574  | -0.000104 |
| H  | -2.506636 | 2.017507  | 0.009073  |
| H  | 3.785600  | 0.012879  | -0.006138 |

---

---

**35**

---

|    |           |           |          |
|----|-----------|-----------|----------|
| C  | -1.587975 | 0.824603  | 0.000000 |
| C  | 1.635842  | 0.366643  | 0.000000 |
| C  | -1.104028 | -1.748351 | 0.000000 |
| C  | -1.510242 | -0.436061 | 0.000000 |
| Al | 0.123855  | 1.383887  | 0.000000 |
| Al | 0.660437  | -1.209069 | 0.000000 |
| H  | -1.742063 | -2.612770 | 0.000000 |
| H  | 2.698263  | 0.538339  | 0.000000 |

---

---

**36**

---

---

|    |          |           |           |
|----|----------|-----------|-----------|
| C  | 0.000000 | 0.000000  | -3.759612 |
| C  | 0.000000 | -0.728309 | 1.025405  |
| H  | 0.000000 | 0.000000  | -4.824065 |
| C  | 0.000000 | 0.000000  | -2.554475 |
| C  | 0.000000 | 0.728309  | 1.025405  |
| H  | 0.000000 | 0.000000  | 4.293852  |
| Al | 0.000000 | 0.000000  | -0.673048 |
| Al | 0.000000 | 0.000000  | 2.732340  |

---

**37**

---

|    |           |           |           |
|----|-----------|-----------|-----------|
| C  | 3.276732  | -1.150196 | -0.018102 |
| H  | 1.374682  | 2.569443  | 0.036314  |
| H  | 4.014977  | -1.917525 | -0.029572 |
| C  | 2.444513  | -0.275863 | -0.005080 |
| Al | -1.344918 | 0.090243  | 0.003583  |
| C  | -3.238898 | 0.041400  | 0.000226  |
| Al | 1.066420  | 1.028296  | 0.014624  |
| C  | -2.785031 | -1.136459 | -0.006975 |

---

**38**

---

|    |           |           |           |
|----|-----------|-----------|-----------|
| C  | 0.883565  | -0.117687 | 0.348232  |
| C  | -0.298479 | 0.617860  | 0.013049  |
| C  | -1.523546 | 0.683133  | -0.542459 |
| Al | 1.694450  | -0.631434 | -1.425965 |
| Al | 0.252559  | -1.542899 | 1.629233  |
| C  | -1.033583 | 1.849302  | 0.035511  |
| H  | -2.342891 | 0.217686  | -1.066794 |
| H  | 1.616861  | 0.510812  | 0.881045  |

---

**39**

---

|    |           |           |           |
|----|-----------|-----------|-----------|
| C  | -0.508622 | 1.678973  | 0.000000  |
| H  | 1.168154  | -1.982703 | -0.000000 |
| C  | -1.741759 | 1.838040  | 0.000000  |
| C  | 0.360599  | -1.235706 | -0.000000 |
| Al | 1.065439  | 0.595454  | 0.000000  |
| Al | -2.090047 | -0.094317 | -0.000000 |
| H  | 2.574532  | 1.021107  | 0.000000  |
| C  | -0.828296 | -1.820848 | -0.000000 |

---

---

**40**

---

|    |           |           |           |
|----|-----------|-----------|-----------|
| C  | -0.189270 | -0.192023 | 0.428319  |
| C  | -0.966814 | 0.767051  | -0.124202 |
| C  | -1.190569 | -1.356064 | 0.123153  |
| C  | -1.968693 | -0.396909 | -0.428493 |
| Al | -0.473269 | 2.673855  | -0.200089 |
| H  | -2.940464 | -0.425064 | -0.910358 |
| Al | -1.685666 | -3.262468 | 0.197554  |
| H  | 0.782300  | -0.164109 | 0.910586  |

---

---

**41**

---

|    |           |           |          |
|----|-----------|-----------|----------|
| C  | -0.262646 | 0.957874  | 0.000000 |
| C  | -1.066609 | -0.129930 | 0.000000 |
| C  | 1.066609  | 0.129930  | 0.000000 |
| C  | 0.262646  | -0.957874 | 0.000000 |
| Al | -3.035728 | -0.041533 | 0.000000 |
| H  | 0.467201  | -2.022522 | 0.000000 |
| Al | 3.035728  | 0.041533  | 0.000000 |
| H  | -0.467201 | 2.022522  | 0.000000 |

---

---

**42**

---

|    |           |           |           |
|----|-----------|-----------|-----------|
| Al | -1.072291 | 0.497226  | 2.909345  |
| C  | 0.655586  | 0.582977  | -0.076917 |
| C  | -0.437222 | -0.251507 | 0.313322  |
| C  | 0.111951  | -0.409215 | -0.991713 |
| Al | 1.507827  | 0.545862  | -1.702453 |
| C  | -1.302261 | -0.570588 | 1.280580  |
| H  | 2.543162  | 0.968729  | -2.775869 |
| H  | -2.006752 | -1.363485 | 1.043705  |

---

---

**43**

---

|    |           |           |           |
|----|-----------|-----------|-----------|
| C  | 1.142729  | 0.568823  | 0.006970  |
| C  | 0.112104  | 1.280859  | 0.065224  |
| C  | -1.254302 | 1.717927  | 0.165624  |
| Al | 1.717103  | -1.226312 | 0.047914  |
| Al | -0.742021 | -0.756367 | 0.251328  |
| H  | -1.505543 | 2.775527  | 0.131099  |
| C  | -2.148867 | 0.695510  | 0.302187  |
| H  | 3.111040  | -1.937936 | -0.043871 |

---

---

**44**

---

|    |           |           |           |
|----|-----------|-----------|-----------|
| C  | -0.428549 | -0.000000 | 1.575778  |
| Al | 0.502669  | -0.000000 | -0.172344 |
| C  | -1.398238 | 0.000000  | 0.389596  |
| Al | 1.161970  | 0.000000  | -3.268152 |
| C  | 1.754420  | -0.000000 | -1.457444 |
| C  | -1.773035 | -0.000000 | 1.685347  |
| H  | 2.790887  | -0.000000 | -1.115490 |
| H  | -2.610124 | -0.000000 | 2.362709  |

---

---

**45**

---

|    |           |           |           |
|----|-----------|-----------|-----------|
| Al | -0.186375 | -0.004374 | 2.153626  |
| C  | 0.401436  | -0.004277 | 0.259391  |
| C  | -0.781807 | 0.010171  | -0.301248 |
| Al | 0.307000  | 0.000174  | -2.329506 |
| C  | 1.572783  | -0.015740 | -0.523700 |
| H  | -1.810086 | 0.021169  | 0.027942  |
| C  | 2.279388  | -0.020415 | -1.550480 |
| H  | -1.782338 | 0.013291  | 2.263975  |

---

---

**46**

---

|    |           |           |           |
|----|-----------|-----------|-----------|
| C  | -0.953741 | 0.000000  | 2.376723  |
| C  | 0.767334  | -0.000000 | 0.035734  |
| C  | -0.513282 | 0.000000  | 0.176640  |
| Al | -0.638128 | 0.000000  | -1.899313 |
| Al | 1.953421  | -0.000000 | -1.428061 |
| C  | -1.541141 | 0.000000  | 1.214605  |
| H  | 3.525334  | -0.000000 | -1.476553 |
| H  | -2.599796 | 0.000000  | 1.000225  |

---

---

**47**

---

|    |           |           |           |
|----|-----------|-----------|-----------|
| C  | 1.891210  | 0.506013  | 0.010683  |
| Al | 3.525784  | -0.356863 | 0.005672  |
| C  | 0.640335  | 0.466456  | 0.005734  |
| C  | -0.675919 | 0.449186  | 0.000730  |
| C  | -1.927506 | 0.458754  | -0.004793 |
| Al | -3.536217 | -0.446822 | -0.024185 |
| H  | 4.985174  | 0.249972  | 0.019573  |
| H  | -5.018315 | 0.100575  | -0.024143 |

---

---

**48**

---

|    |           |           |           |
|----|-----------|-----------|-----------|
| Al | 0.138253  | -0.007466 | -0.205994 |
| H  | -0.611266 | -0.005893 | 1.157188  |
| C  | 2.035263  | 0.002431  | -0.771805 |
| C  | 1.288879  | -0.006461 | -1.785556 |
| C  | -0.105538 | -0.016364 | -2.185372 |
| C  | -0.725716 | -0.025073 | -3.332049 |
| Al | -2.286622 | -0.037625 | -4.288867 |
| H  | -2.541718 | -0.043845 | -5.844897 |

---

---

**49**

---

|    |           |           |           |
|----|-----------|-----------|-----------|
| C  | 0.671456  | 0.023223  | 0.020544  |
| H  | 0.503333  | 0.027578  | 1.084361  |
| C  | 1.564637  | 0.024127  | -1.049687 |
| C  | 0.128810  | 0.012385  | -1.197625 |
| Al | -1.328501 | -0.005621 | -2.468650 |
| C  | -2.925197 | -0.017698 | -3.274340 |
| Al | -2.422606 | -0.028522 | -4.998649 |
| H  | -2.373275 | -0.038031 | -6.571432 |

---

---

**50**

---

|    |          |           |           |
|----|----------|-----------|-----------|
| C  | 0.000000 | -1.286238 | 1.176695  |
| C  | 0.000000 | 0.000000  | -1.104801 |
| C  | 0.000000 | 1.286238  | 1.176695  |
| C  | 0.000000 | 0.000000  | 0.645519  |
| Al | 0.000000 | -1.724052 | -0.607268 |
| Al | 0.000000 | 1.724052  | -0.607268 |
| H  | 0.000000 | -1.569987 | 2.211937  |
| H  | 0.000000 | 1.569987  | 2.211937  |

---

---

**51**

---

|    |           |           |          |
|----|-----------|-----------|----------|
| C  | 0.011166  | 0.721478  | 0.000000 |
| C  | -1.076896 | -0.088814 | 0.000000 |
| C  | 1.821513  | -1.143024 | 0.000000 |
| C  | 1.234003  | -0.052121 | 0.000000 |
| Al | -0.037276 | -1.729250 | 0.000000 |
| H  | -2.084381 | 0.298861  | 0.000000 |
| Al | -0.557925 | -4.063518 | 0.000000 |
| H  | -0.002682 | 1.804698  | 0.000000 |

---



---

**52**

---

|    |           |           |           |
|----|-----------|-----------|-----------|
| Al | 0.020914  | 1.194076  | -0.000000 |
| C  | 1.323984  | -0.345632 | -0.000000 |
| C  | -1.915494 | 1.091939  | -0.000000 |
| C  | 0.158222  | -0.934591 | -0.000000 |
| C  | 1.928770  | 0.838400  | -0.000000 |
| Al | -1.743573 | -0.863561 | -0.000000 |
| H  | 2.973758  | 1.091519  | -0.000000 |
| H  | -2.746581 | -2.072149 | -0.000000 |

---

---

**53**

---

|    |           |          |           |
|----|-----------|----------|-----------|
| Al | -0.283919 | 0.000000 | -1.087279 |
| H  | -1.414618 | 0.000000 | 0.000743  |
| C  | 1.731165  | 0.000000 | -0.946820 |
| Al | 1.411272  | 0.000000 | -2.842864 |
| C  | -0.439020 | 0.000000 | -3.044100 |
| C  | -1.460624 | 0.000000 | -3.968078 |
| C  | -2.368185 | 0.000000 | -4.768856 |
| H  | -3.169410 | 0.000000 | -5.465926 |

---

---

**54**

---

|    |           |           |           |
|----|-----------|-----------|-----------|
| Al | -3.751353 | -0.085522 | 2.292877  |
| H  | 1.320275  | 0.109613  | 1.473004  |
| C  | 0.533836  | 0.048776  | 0.726239  |
| Al | 0.950180  | 0.009811  | -1.057288 |
| C  | 1.968935  | -0.000655 | -2.586881 |
| C  | -0.768455 | 0.005001  | 1.201721  |
| H  | 1.682279  | -0.051358 | -3.636462 |
| C  | -1.935696 | -0.035665 | 1.586789  |

---

---

**55**

---

|    |           |           |          |
|----|-----------|-----------|----------|
| C  | -1.616240 | -3.181202 | 0.000000 |
| H  | -2.955405 | -0.234369 | 0.000000 |
| H  | -1.482255 | -4.234788 | 0.000000 |
| C  | -1.784141 | -1.983689 | 0.000000 |
| Al | -0.504555 | 0.562339  | 0.000000 |
| C  | 0.825597  | 1.805029  | 0.000000 |
| C  | -1.932595 | -0.599332 | 0.000000 |
| Al | 2.738245  | 2.237569  | 0.000000 |

---

---

**56**

---

|    |           |           |           |
|----|-----------|-----------|-----------|
| C  | -1.298743 | -0.197145 | -0.031398 |
| C  | 1.581403  | -0.748102 | -0.007114 |
| C  | 2.033819  | 0.409332  | -0.071283 |
| Al | 0.178641  | 0.829425  | -0.064891 |
| Al | -0.175794 | -1.726852 | 0.044350  |
| H  | -2.371623 | -0.099625 | -0.020626 |
| C  | -0.206108 | -3.633542 | 0.443569  |
| H  | -0.308505 | -4.380726 | -0.353830 |

---

---

**57**

---

|    |          |           |           |
|----|----------|-----------|-----------|
| C  | 0.000000 | 0.000000  | -1.513107 |
| C  | 0.000000 | 0.000000  | 0.207889  |
| H  | 0.000000 | 2.887463  | 1.795508  |
| H  | 0.000000 | -2.887463 | 1.795508  |
| Al | 0.000000 | -1.828744 | 0.659155  |
| Al | 0.000000 | 1.828744  | 0.659155  |
| C  | 0.000000 | -1.230963 | -1.074837 |
| C  | 0.000000 | 1.230963  | -1.074837 |

---

---

**58**

---

|    |          |           |           |
|----|----------|-----------|-----------|
| C  | 0.000000 | 1.903112  | 0.864028  |
| C  | 0.000000 | -1.903112 | 0.864028  |
| H  | 0.000000 | 2.933258  | 1.231592  |
| H  | 0.000000 | -2.933258 | 1.231592  |
| C  | 0.000000 | -1.480168 | -0.429924 |
| C  | 0.000000 | 1.480168  | -0.429924 |
| Al | 0.000000 | 0.000000  | -1.518029 |
| Al | 0.000000 | 0.000000  | 0.927855  |

---

---

**59**

---

|    |          |           |           |
|----|----------|-----------|-----------|
| C  | 0.000000 | 0.000000  | -0.295117 |
| C  | 0.000000 | 1.273928  | -1.004316 |
| C  | 0.000000 | -1.273928 | -1.004316 |
| Al | 0.000000 | 0.000000  | -2.327972 |
| C  | 0.000000 | 0.000000  | 1.036946  |
| Al | 0.000000 | 0.000000  | 3.008403  |
| H  | 0.000000 | -2.269495 | -0.612657 |
| H  | 0.000000 | 2.269495  | -0.612657 |

---

---

**60**

---

|    |           |           |          |
|----|-----------|-----------|----------|
| C  | 1.749553  | 0.486653  | 0.000000 |
| C  | 0.502315  | 0.474701  | 0.000000 |
| Al | -1.420382 | -0.223317 | 0.000000 |
| C  | -3.101205 | 0.385664  | 0.000000 |
| Al | 1.664518  | -1.368183 | 0.000000 |
| C  | -0.118830 | -1.716346 | 0.000000 |
| H  | -3.305133 | 1.450230  | 0.000000 |
| H  | -3.979448 | -0.246818 | 0.000000 |

---

---

**61**

---

|    |           |           |          |
|----|-----------|-----------|----------|
| C  | 0.277169  | -2.610273 | 0.000000 |
| H  | -2.734351 | 0.259423  | 0.000000 |
| C  | 0.841552  | -3.719379 | 0.000000 |
| C  | -0.316293 | -1.458135 | 0.000000 |
| C  | -0.048192 | 1.714256  | 0.000000 |
| Al | -1.159796 | 0.220686  | 0.000000 |
| Al | 0.949056  | 3.103028  | 0.000000 |
| H  | 1.322260  | -4.665931 | 0.000000 |

---

---

**62**

---

|    |           |           |          |
|----|-----------|-----------|----------|
| H  | -2.632241 | 1.788568  | 0.000000 |
| C  | 1.334820  | -0.128611 | 0.000000 |
| C  | -3.112164 | 0.794273  | 0.000000 |
| C  | 0.139867  | -0.374593 | 0.000000 |
| Al | 3.192594  | 0.224415  | 0.000000 |
| Al | -1.760017 | -0.700512 | 0.000000 |
| C  | 5.070458  | 0.593539  | 0.000000 |
| H  | -2.233318 | -2.197079 | 0.000000 |

---

**Table S7.** Optimized geometries of isomers of Al<sub>2</sub>C<sub>4</sub>H<sub>2</sub> in Cartesian coordinates (in Angström units) obtained at B3LYP/6-311++G(2d,2p) level of theory.

| <b>1</b> |           |           |          |
|----------|-----------|-----------|----------|
| C        | -1.218942 | -3.544513 | 0.000000 |
| H        | -2.989348 | 0.184085  | 0.000000 |
| H        | -1.115963 | -4.602474 | 0.000000 |
| C        | -1.332441 | -2.340315 | 0.000000 |
| C        | 0.000000  | 0.659970  | 0.000000 |
| C        | 0.982334  | 1.395048  | 0.000000 |
| Al       | -1.553809 | -0.446983 | 0.000000 |
| Al       | 2.593779  | 2.554463  | 0.000000 |
| <b>2</b> |           |           |          |
| C        | -0.698362 | -0.550140 | 0.000000 |
| C        | 0.000000  | 0.683774  | 0.000000 |
| C        | 0.588915  | 1.757265  | 0.000000 |
| Al       | 1.538168  | 3.479313  | 0.000000 |
| C        | -0.132557 | -1.779082 | 0.000000 |
| Al       | -1.362742 | -3.358400 | 0.000000 |
| H        | 0.956702  | -1.794007 | 0.000000 |
| H        | -1.785211 | -0.448760 | 0.000000 |
| <b>3</b> |           |           |          |
| C        | -0.310776 | 0.657391  | 0.000000 |
| C        | -0.310776 | -1.813040 | 0.000000 |
| C        | 0.310776  | 1.813040  | 0.000000 |
| C        | 0.310776  | -0.657391 | 0.000000 |
| Al       | -1.994488 | -0.709642 | 0.000000 |
| Al       | 1.994488  | 0.709642  | 0.000000 |
| H        | 0.109162  | -2.803593 | 0.000000 |
| H        | -0.109162 | 2.803593  | 0.000000 |

---

**4**

---

|    |           |           |          |
|----|-----------|-----------|----------|
| C  | -0.352255 | 1.406262  | 0.000000 |
| C  | 1.524623  | -1.022362 | 0.000000 |
| C  | -1.524623 | 1.022362  | 0.000000 |
| C  | 0.352255  | -1.406262 | 0.000000 |
| Al | 1.524623  | 0.889953  | 0.000000 |
| Al | -1.524623 | -0.889953 | 0.000000 |
| H  | 2.733261  | 1.881317  | 0.000000 |
| H  | -2.733261 | -1.881317 | 0.000000 |

---

**5**

---

|    |          |           |           |
|----|----------|-----------|-----------|
| C  | 0.000000 | 1.507462  | 0.614218  |
| C  | 0.000000 | 1.507462  | -0.614218 |
| Al | 0.000000 | 0.000000  | 1.812755  |
| C  | 0.000000 | -1.507462 | 0.614218  |
| C  | 0.000000 | -1.507462 | -0.614218 |
| Al | 0.000000 | 0.000000  | -1.812755 |
| H  | 0.000000 | 0.000000  | -3.375701 |
| H  | 0.000000 | 0.000000  | 3.375701  |

---

**6**

---

|    |           |           |          |
|----|-----------|-----------|----------|
| C  | 1.163376  | 0.780751  | 0.000000 |
| C  | 0.000000  | 0.382718  | 0.000000 |
| C  | -1.260306 | -0.239798 | 0.000000 |
| C  | -2.437646 | 0.413282  | 0.000000 |
| Al | 2.964125  | 1.546293  | 0.000000 |
| Al | -1.340526 | -2.268487 | 0.000000 |
| H  | -3.379330 | -0.128867 | 0.000000 |
| H  | -2.519991 | 1.495674  | 0.000000 |

---

**7**

---

|    |           |           |          |
|----|-----------|-----------|----------|
| C  | -2.295245 | 0.009785  | 0.000000 |
| C  | -1.411291 | 1.031610  | 0.000000 |
| C  | 0.000000  | 0.839352  | 0.000000 |
| C  | 1.215767  | 0.690245  | 0.000000 |
| Al | -1.639452 | -1.901532 | 0.000000 |
| Al | 3.179233  | 0.531604  | 0.000000 |
| H  | -3.342914 | 0.310341  | 0.000000 |
| H  | -1.729629 | 2.072787  | 0.000000 |

---

---

**8**

---

|    |           |           |           |
|----|-----------|-----------|-----------|
| C  | 0.595213  | -0.579535 | 0.299545  |
| C  | -0.658195 | 0.057430  | 0.116528  |
| C  | -1.747970 | 0.593054  | -0.040642 |
| Al | -3.496261 | 1.456731  | -0.293770 |
| C  | 1.799022  | 0.037264  | 0.328430  |
| Al | 3.415023  | -1.111420 | 0.605321  |
| H  | 1.775452  | 1.118377  | 0.196707  |
| H  | 0.532603  | -1.662160 | 0.424130  |

---

---

**9**

---

|    |          |           |           |
|----|----------|-----------|-----------|
| C  | 0.000000 | 0.000000  | -1.745151 |
| C  | 0.000000 | 0.000000  | -0.522660 |
| C  | 0.000000 | 0.000000  | 0.834463  |
| C  | 0.000000 | 0.000000  | 2.061496  |
| Al | 0.000000 | 0.000000  | 4.041891  |
| Al | 0.000000 | 0.000000  | -3.653492 |
| H  | 0.000000 | 1.380765  | -4.409030 |
| H  | 0.000000 | -1.380765 | -4.409030 |

---

---

**11**

---

|    |          |           |           |
|----|----------|-----------|-----------|
| C  | 0.000000 | 1.925802  | 0.913791  |
| C  | 0.000000 | 0.648878  | 1.171343  |
| C  | 0.000000 | -0.648878 | 1.171343  |
| C  | 0.000000 | -1.925802 | 0.913791  |
| Al | 0.000000 | 1.630958  | -1.089260 |
| Al | 0.000000 | -1.630958 | -1.089260 |
| H  | 0.000000 | -2.718667 | 1.649575  |
| H  | 0.000000 | 2.718667  | 1.649575  |

---

---

**12**

---

|    |          |           |           |
|----|----------|-----------|-----------|
| H  | 0.000000 | 1.347452  | -3.942097 |
| H  | 0.000000 | -1.347452 | -3.942097 |
| C  | 0.000000 | 0.685468  | -3.080902 |
| C  | 0.000000 | -0.685468 | -3.080902 |
| Al | 0.000000 | 0.000000  | -1.357089 |
| C  | 0.000000 | 0.000000  | 0.531690  |
| Al | 0.000000 | 0.000000  | 3.750909  |
| C  | 0.000000 | 0.000000  | 1.757536  |

---

---

**13**

---

|    |           |           |          |
|----|-----------|-----------|----------|
| H  | -0.315726 | -3.425736 | 0.000000 |
| C  | -1.061870 | 2.145807  | 0.000000 |
| C  | -1.624923 | 3.216925  | 0.000000 |
| H  | -2.132986 | 4.150716  | 0.000000 |
| C  | -0.094828 | -2.372728 | 0.000000 |
| C  | -0.692544 | -1.246184 | 0.000000 |
| Al | 1.791823  | -1.424430 | 0.000000 |
| Al | 0.000000  | 0.563823  | 0.000000 |

---

---

**14**

---

|    |           |           |          |
|----|-----------|-----------|----------|
| C  | 0.004592  | -0.771866 | 0.000000 |
| C  | -0.675566 | 0.402562  | 0.000000 |
| C  | -2.051108 | 0.643947  | 0.000000 |
| Al | 1.958747  | -1.586645 | 0.000000 |
| Al | 1.157461  | 1.083898  | 0.000000 |
| C  | -3.225849 | 0.923585  | 0.000000 |
| H  | -4.259715 | 1.160997  | 0.000000 |
| H  | -0.564775 | -1.714816 | 0.000000 |

---

---

**15**

---

|    |           |           |          |
|----|-----------|-----------|----------|
| H  | 2.360427  | -1.363454 | 0.000000 |
| H  | -1.028975 | -4.116858 | 0.000000 |
| Al | -0.166575 | -2.813759 | 0.000000 |
| C  | 1.343029  | -1.740511 | 0.000000 |
| C  | 0.195787  | -0.970175 | 0.000000 |
| C  | 0.000000  | 0.409976  | 0.000000 |
| Al | -0.542903 | 3.550826  | 0.000000 |
| C  | -0.223521 | 1.617118  | 0.000000 |

---

---

**16**

---

|    |           |           |          |
|----|-----------|-----------|----------|
| Al | 0.000000  | -1.546777 | 0.000000 |
| H  | -3.779689 | 0.000000  | 0.000000 |
| C  | 1.494719  | 0.000000  | 0.000000 |
| Al | 0.000000  | 1.546777  | 0.000000 |
| C  | -2.713894 | 0.000000  | 0.000000 |
| C  | 2.713894  | 0.000000  | 0.000000 |
| C  | -1.494719 | 0.000000  | 0.000000 |
| H  | 3.779689  | 0.000000  | 0.000000 |

---

---

**17**

---

|    |          |           |           |
|----|----------|-----------|-----------|
| C  | 0.000000 | 2.701169  | -1.600439 |
| H  | 0.000000 | 3.643712  | -2.091703 |
| C  | 0.000000 | 1.615165  | -1.061762 |
| C  | 0.000000 | -1.615165 | -1.061762 |
| C  | 0.000000 | -2.701169 | -1.600439 |
| Al | 0.000000 | 0.000000  | -0.005125 |
| H  | 0.000000 | -3.643712 | -2.091703 |
| Al | 0.000000 | 0.000000  | 2.784342  |

---

---

**18**

---

|    |           |           |           |
|----|-----------|-----------|-----------|
| C  | -0.807790 | 1.741011  | 0.000031  |
| H  | -1.220721 | 2.746144  | 0.000071  |
| Al | -2.250639 | -1.210134 | -0.000001 |
| C  | -1.514502 | 0.589504  | -0.000045 |
| Al | 0.426604  | 0.336315  | -0.000087 |
| C  | 2.226933  | -0.202442 | -0.000131 |
| C  | 3.373856  | -0.583267 | -0.000159 |
| H  | 4.383873  | -0.914884 | -0.000224 |

---

---

**19**

---

|    |           |           |          |
|----|-----------|-----------|----------|
| H  | 0.455860  | -4.004351 | 0.000000 |
| H  | -1.873088 | -0.485802 | 0.000000 |
| C  | -0.290108 | -1.864456 | 0.000000 |
| C  | 0.000000  | 0.606492  | 0.000000 |
| C  | 0.100857  | -3.004249 | 0.000000 |
| C  | -0.766387 | -0.517207 | 0.000000 |
| Al | -1.447372 | 1.998563  | 0.000000 |
| Al | 1.997454  | 0.552719  | 0.000000 |

---

---

**20**

---

|    |           |           |          |
|----|-----------|-----------|----------|
| C  | -0.996203 | 2.148061  | 0.000000 |
| C  | -1.557053 | 3.219557  | 0.000000 |
| H  | -2.060768 | 4.155854  | 0.000000 |
| C  | -0.178562 | -2.447905 | 0.000000 |
| C  | -0.682830 | -1.295074 | 0.000000 |
| Al | 1.508727  | -1.440633 | 0.000000 |
| Al | 0.000000  | 0.532226  | 0.000000 |
| H  | 2.935198  | -2.094401 | 0.000000 |

---



---

**21**

---

|    |           |           |          |
|----|-----------|-----------|----------|
| C  | 0.000000  | 0.663949  | 0.000000 |
| C  | -1.074046 | -0.188739 | 0.000000 |
| C  | 1.845602  | -1.214141 | 0.000000 |
| C  | 1.189801  | -0.155663 | 0.000000 |
| Al | -0.679193 | 2.559500  | 0.000000 |
| Al | -0.030629 | -1.898599 | 0.000000 |
| H  | -2.097092 | 0.189734  | 0.000000 |
| H  | -0.443369 | -3.413888 | 0.000000 |

---

---

**22**

---

|    |          |           |           |
|----|----------|-----------|-----------|
| C  | 0.000000 | 1.585846  | -0.644869 |
| C  | 0.000000 | 0.998866  | 0.488317  |
| H  | 0.000000 | -2.622478 | -0.934610 |
| H  | 0.000000 | 2.622478  | -0.934610 |
| Al | 0.000000 | 0.000000  | -1.950161 |
| C  | 0.000000 | -1.585846 | -0.644869 |
| C  | 0.000000 | -0.998866 | 0.488317  |
| Al | 0.000000 | 0.000000  | 2.238457  |

---

---

**23**

---

|    |           |           |           |
|----|-----------|-----------|-----------|
| H  | -3.919630 | 1.030593  | 0.114592  |
| H  | 0.380503  | 0.459792  | -0.293094 |
| C  | -1.751280 | 0.609095  | 0.159248  |
| C  | -0.626771 | -1.437890 | 0.100476  |
| C  | -2.991789 | 0.525177  | -0.059629 |
| C  | -0.505698 | -0.097337 | 0.002144  |
| Al | -0.438887 | -3.336333 | 0.285677  |
| Al | -2.646888 | -1.497930 | -0.522280 |

---

---

**24**

---

|    |           |           |           |
|----|-----------|-----------|-----------|
| C  | 0.000085  | 0.680775  | 1.522886  |
| C  | -0.000085 | -0.680775 | 1.522886  |
| H  | 0.000250  | 2.476563  | -2.092900 |
| C  | 0.000189  | 1.769608  | 0.933014  |
| C  | -0.000189 | -1.769608 | 0.933014  |
| Al | 0.000171  | 1.357663  | -0.975837 |
| Al | -0.000171 | -1.357663 | -0.975837 |
| H  | -0.000250 | -2.476563 | -2.092900 |

---

---

**26**

---

|    |           |           |          |
|----|-----------|-----------|----------|
| Al | 1.086254  | 0.852647  | 0.000000 |
| C  | 2.837079  | 0.001308  | 0.000000 |
| C  | 3.991868  | -0.372146 | 0.000000 |
| Al | -1.086254 | -0.852647 | 0.000000 |
| C  | -2.837079 | -0.001308 | 0.000000 |
| C  | -3.991868 | 0.372146  | 0.000000 |
| H  | -4.998981 | 0.713308  | 0.000000 |
| H  | 4.998981  | -0.713308 | 0.000000 |

---

---

**27**

---

|    |           |           |          |
|----|-----------|-----------|----------|
| Al | 1.510559  | 0.601456  | 0.000000 |
| H  | 2.860855  | 1.381991  | 0.000000 |
| Al | 0.744912  | -2.419124 | 0.000000 |
| C  | -0.001222 | -0.631523 | 0.000000 |
| C  | -0.377790 | 0.678658  | 0.000000 |
| C  | -1.641345 | 1.278192  | 0.000000 |
| C  | -2.700403 | 1.855958  | 0.000000 |
| H  | -3.636456 | 2.355069  | 0.000000 |

---

---

**28**

---

|    |           |           |          |
|----|-----------|-----------|----------|
| C  | 0.179106  | 1.597464  | 0.000000 |
| Al | 1.592799  | 0.212967  | 0.000000 |
| C  | 0.043773  | -1.172716 | 0.000000 |
| C  | 0.084807  | -2.498423 | 0.000000 |
| C  | -0.939747 | 2.175434  | 0.000000 |
| Al | -1.361394 | 0.214656  | 0.000000 |
| H  | 1.026726  | -3.038435 | 0.000000 |
| H  | -0.808439 | -3.114116 | 0.000000 |

---

---

**29**

---

|    |          |           |           |
|----|----------|-----------|-----------|
| C  | 0.000000 | 0.632216  | -3.417621 |
| C  | 0.000000 | -0.632216 | -3.417621 |
| C  | 0.000000 | 0.000000  | 0.231248  |
| C  | 0.000000 | 0.000000  | 1.451921  |
| Al | 0.000000 | 0.000000  | -1.642626 |
| Al | 0.000000 | 0.000000  | 3.385229  |
| H  | 0.000000 | 1.391979  | 4.110922  |
| H  | 0.000000 | -1.391979 | 4.110922  |

---

**30**

---

|    |           |           |          |
|----|-----------|-----------|----------|
| H  | 1.546298  | 0.177655  | 0.000000 |
| C  | -0.664160 | -2.846231 | 0.000000 |
| Al | 0.019736  | 2.854250  | 0.000000 |
| C  | 0.603859  | -2.864392 | 0.000000 |
| C  | 0.691160  | 0.887319  | 0.000000 |
| C  | -0.675336 | 0.895191  | 0.000000 |
| Al | 0.000000  | -1.069755 | 0.000000 |
| H  | -1.535994 | 0.192580  | 0.000000 |

---

**32**

---

|    |           |           |          |
|----|-----------|-----------|----------|
| C  | -0.030605 | -0.857486 | 0.000000 |
| C  | -0.954143 | -1.838756 | 0.000000 |
| C  | -0.012271 | 2.851474  | 0.000000 |
| Al | -0.443257 | 1.003558  | 0.000000 |
| Al | 1.694182  | -1.925235 | 0.000000 |
| C  | -1.269276 | 2.715650  | 0.000000 |
| H  | -0.676653 | -2.903959 | 0.000000 |
| H  | -2.033441 | -1.702115 | 0.000000 |

---

**34**

---

|    |           |           |           |
|----|-----------|-----------|-----------|
| C  | -0.532085 | 0.688799  | -0.000026 |
| C  | -0.496374 | -0.728590 | -0.000249 |
| C  | 2.035136  | 1.096717  | -0.000247 |
| C  | 0.793076  | 1.209991  | -0.000098 |
| Al | 1.500159  | -0.836197 | 0.001615  |
| Al | -2.235880 | -0.059541 | 0.000026  |
| H  | 2.527874  | -2.025048 | 0.004842  |
| H  | -3.796460 | -0.004268 | -0.000151 |

---

**35**

---

|    |           |           |          |
|----|-----------|-----------|----------|
| C  | -0.707264 | 1.599130  | 0.000000 |
| C  | 1.694205  | -0.561938 | 0.000000 |
| C  | -1.785263 | -0.774821 | 0.000000 |
| C  | -1.390071 | 0.533979  | 0.000000 |
| Al | 1.045823  | 1.152774  | 0.000000 |
| Al | -0.006230 | -1.325855 | 0.000000 |
| H  | -2.784495 | -1.168211 | 0.000000 |
| H  | 2.666898  | -1.020974 | 0.000000 |

---

**36**

---

|    |          |           |           |
|----|----------|-----------|-----------|
| C  | 0.000000 | 0.000000  | -3.783548 |
| C  | 0.000000 | 0.726496  | 1.016984  |
| H  | 0.000000 | 0.000000  | -4.846614 |
| C  | 0.000000 | 0.000000  | -2.575022 |
| C  | 0.000000 | -0.726496 | 1.016984  |
| H  | 0.000000 | 0.000000  | 4.294134  |
| Al | 0.000000 | 0.000000  | -0.694172 |
| Al | 0.000000 | 0.000000  | 2.734710  |

---

**37**

---

|    |           |           |           |
|----|-----------|-----------|-----------|
| C  | -3.299404 | -1.149547 | -0.000074 |
| H  | -1.382086 | 2.556297  | 0.000076  |
| H  | -4.045573 | -1.907385 | -0.000185 |
| C  | -2.455352 | -0.282174 | 0.000057  |
| Al | 1.356192  | 0.088998  | 0.000082  |
| C  | 3.261461  | 0.050485  | -0.000348 |
| Al | -1.067785 | 1.015630  | 0.000257  |
| C  | 2.816354  | -1.132637 | 0.000246  |

---

**38**

---

|    |           |           |           |
|----|-----------|-----------|-----------|
| C  | -0.439725 | -0.000145 | 0.540633  |
| C  | 0.947301  | -0.000269 | 0.202037  |
| C  | 1.943569  | 0.000050  | -0.710466 |
| Al | -1.190911 | -1.767738 | -0.132615 |
| Al | -1.189833 | 1.767930  | -0.132589 |
| C  | 2.325584  | -0.000870 | 0.625829  |
| H  | 2.274891  | 0.000538  | -1.737507 |
| H  | -0.598311 | -0.000390 | 1.633812  |

---

**40**

---

|    |          |           |           |
|----|----------|-----------|-----------|
| C  | 0.000000 | 0.944092  | 0.000000  |
| C  | 0.000000 | 0.000000  | 1.101852  |
| C  | 0.000000 | 0.000000  | -1.101852 |
| C  | 0.000000 | -0.944092 | 0.000000  |
| Al | 0.000000 | 0.000000  | 3.062624  |
| H  | 0.000000 | -2.035593 | 0.000000  |
| Al | 0.000000 | 0.000000  | -3.062624 |
| H  | 0.000000 | 2.035593  | 0.000000  |

---

**41**

---

|    |           |           |          |
|----|-----------|-----------|----------|
| C  | -0.255204 | 0.962016  | 0.000000 |
| C  | -1.072275 | -0.121511 | 0.000000 |
| C  | 1.072275  | 0.121511  | 0.000000 |
| C  | 0.255204  | -0.962016 | 0.000000 |
| Al | -3.061091 | -0.060717 | 0.000000 |
| H  | 0.449259  | -2.029391 | 0.000000 |
| Al | 3.061091  | 0.060717  | 0.000000 |
| H  | -0.449259 | 2.029391  | 0.000000 |

---

**42**

---

|    |           |           |           |
|----|-----------|-----------|-----------|
| Al | -2.855104 | -0.577561 | 0.000106  |
| C  | 0.725823  | -0.515347 | -0.000251 |
| C  | -0.228236 | 0.545614  | -0.000295 |
| C  | 1.156930  | 0.886315  | -0.000499 |
| Al | 2.559780  | -0.310441 | -0.000318 |
| C  | -1.526405 | 0.885036  | 0.000025  |
| H  | 4.038195  | -0.772460 | -0.000683 |
| H  | -1.730792 | 1.954304  | -0.000032 |

---

**43**

---

|    |           |           |          |
|----|-----------|-----------|----------|
| C  | -0.593206 | 1.103279  | 0.000193 |
| C  | 0.662587  | 1.068060  | 0.000201 |
| C  | 2.033496  | 0.657221  | 0.000214 |
| Al | -2.112453 | -0.019297 | 0.000217 |
| Al | 0.191489  | -1.177768 | 0.000088 |
| H  | 2.843146  | 1.384624  | 0.000294 |
| C  | 2.207080  | -0.695549 | 0.000146 |
| H  | -3.657475 | 0.270955  | 0.000300 |

---

**44**

---

|    |           |           |          |
|----|-----------|-----------|----------|
| C  | 1.794645  | 1.398917  | 0.000000 |
| Al | 0.010841  | 0.522417  | 0.000000 |
| C  | 1.875657  | -0.140895 | 0.000000 |
| Al | -2.416771 | -1.632691 | 0.000000 |
| C  | -1.764460 | 0.175816  | 0.000000 |
| C  | 2.944708  | 0.687852  | 0.000000 |
| H  | -2.404453 | 1.060631  | 0.000000 |
| H  | 4.019929  | 0.745169  | 0.000000 |

---

---

**45**

---

|    |           |           |           |
|----|-----------|-----------|-----------|
| Al | 2.477146  | 0.292886  | 0.000078  |
| C  | 0.473080  | 0.192147  | 0.000379  |
| C  | 0.255185  | -1.115050 | 0.000989  |
| Al | -1.926167 | -0.736355 | 0.000893  |
| C  | -0.644656 | 1.051899  | 0.000138  |
| H  | 0.918392  | -1.967922 | 0.001224  |
| C  | -1.850930 | 1.377660  | -0.000147 |
| H  | 3.073159  | -1.200166 | 0.000598  |

---

---

**46**

---

|    |           |           |          |
|----|-----------|-----------|----------|
| C  | -2.846452 | 0.654153  | 0.000000 |
| C  | 0.004987  | 0.814262  | 0.000000 |
| C  | -0.830792 | -0.166860 | 0.000000 |
| Al | 0.857461  | -1.481610 | 0.000000 |
| Al | 1.890148  | 1.004404  | 0.000000 |
| C  | -2.249784 | -0.505719 | 0.000000 |
| H  | 2.722317  | 2.341947  | 0.000000 |
| H  | -2.635346 | -1.513305 | 0.000000 |

---

---

**47**

---

|    |           |           |           |
|----|-----------|-----------|-----------|
| C  | -1.906298 | 0.269358  | -0.000116 |
| Al | -3.661177 | -0.386714 | 0.000005  |
| C  | -0.663149 | 0.205565  | -0.000114 |
| C  | 0.664351  | 0.204142  | -0.000153 |
| C  | 1.907575  | 0.266365  | -0.000091 |
| Al | 3.661620  | -0.391959 | 0.000392  |
| H  | -4.947166 | 0.542404  | -0.001435 |
| H  | 4.948723  | 0.535630  | 0.000888  |

---

---

**48**

---

|    |           |           |           |
|----|-----------|-----------|-----------|
| Al | -1.811911 | -0.849927 | -0.000173 |
| H  | -2.373851 | -2.299380 | -0.000339 |
| C  | -2.531431 | 0.989047  | -0.000023 |
| C  | -1.267595 | 1.032416  | 0.000017  |
| C  | -0.084820 | 0.216851  | -0.000028 |
| C  | 1.202699  | 0.393619  | 0.000112  |
| Al | 2.931313  | -0.305923 | -0.000041 |
| H  | 4.214915  | 0.623221  | -0.000023 |

---

**49**

---

|    |           |           |           |
|----|-----------|-----------|-----------|
| C  | -3.144191 | 0.313902  | -0.001010 |
| H  | -3.854826 | 1.123866  | -0.001801 |
| C  | -2.895946 | -1.058374 | 0.000069  |
| C  | -1.857123 | -0.048997 | -0.000348 |
| Al | 0.054107  | 0.271277  | -0.000148 |
| C  | 1.688317  | 1.021088  | -0.000050 |
| Al | 2.780310  | -0.415255 | -0.000185 |
| H  | 4.026992  | -1.377135 | -0.000082 |

---

**50**

---

|    |           |           |          |
|----|-----------|-----------|----------|
| Al | -0.019295 | -1.127842 | 0.000000 |
| C  | 1.664523  | 0.083779  | 0.000000 |
| C  | -1.862463 | -0.498992 | 0.000000 |
| C  | 0.669667  | 0.930230  | 0.000000 |
| C  | 1.947818  | -1.219148 | 0.000000 |
| Al | -1.206628 | 1.345593  | 0.000000 |
| H  | 2.893461  | -1.732176 | 0.000000 |
| H  | -1.840075 | 2.782099  | 0.000000 |

---

**52**

---

|    |           |           |          |
|----|-----------|-----------|----------|
| Al | -0.019295 | -1.127842 | 0.000000 |
| C  | 1.664523  | 0.083779  | 0.000000 |
| C  | -1.862463 | -0.498992 | 0.000000 |
| C  | 0.669667  | 0.930230  | 0.000000 |
| C  | 1.947818  | -1.219148 | 0.000000 |
| Al | -1.206628 | 1.345593  | 0.000000 |
| H  | 2.893461  | -1.732176 | 0.000000 |
| H  | -1.840075 | 2.782099  | 0.000000 |

---

**53**

---

|    |           |           |          |
|----|-----------|-----------|----------|
| Al | 0.990477  | -1.108065 | 0.000000 |
| H  | 2.545674  | -1.321975 | 0.000000 |
| C  | -0.576038 | -2.379594 | 0.000000 |
| Al | -1.433020 | -0.637098 | 0.000000 |
| C  | -0.004199 | 0.606083  | 0.000000 |
| C  | 0.311491  | 1.932105  | 0.000000 |
| C  | 0.608024  | 3.114379  | 0.000000 |
| H  | 0.873343  | 4.141419  | 0.000000 |

---

**54**

---

|    |           |           |           |
|----|-----------|-----------|-----------|
| Al | -3.740466 | -0.273035 | 0.000519  |
| H  | 0.899406  | 1.959211  | -0.000815 |
| C  | 0.684343  | 0.892725  | -0.000278 |
| Al | 2.143371  | -0.277299 | -0.001152 |
| C  | 3.960854  | -0.528223 | 0.002131  |
| C  | -0.638252 | 0.536547  | 0.000631  |
| H  | 4.542101  | -1.449067 | 0.004155  |
| C  | -1.827484 | 0.186410  | 0.001647  |

---

**55**

---

|    |           |           |          |
|----|-----------|-----------|----------|
| C  | -3.598810 | -1.025306 | 0.000000 |
| H  | -2.191716 | 1.884406  | 0.000000 |
| H  | -4.323059 | -1.800648 | 0.000000 |
| C  | -2.776936 | -0.128324 | 0.000000 |
| Al | 0.031430  | 0.564586  | 0.000000 |
| C  | 1.850079  | 0.456892  | 0.000000 |
| C  | -1.819735 | 0.863274  | 0.000000 |
| Al | 3.475356  | -0.636315 | 0.000000 |

---

**56**

---

|    |           |           |           |
|----|-----------|-----------|-----------|
| C  | -0.090693 | -1.516648 | -0.089897 |
| C  | -0.554248 | 1.366245  | -0.121066 |
| C  | -1.782824 | 1.404558  | 0.085218  |
| Al | -1.570312 | -0.490079 | 0.206120  |
| Al | 0.973862  | 0.077186  | -0.224838 |
| H  | 0.188811  | -2.556688 | -0.050590 |
| C  | 2.830378  | 0.469985  | 0.153081  |
| H  | 3.638521  | 0.073882  | -0.474057 |

---

**59**

---

|    |          |           |           |
|----|----------|-----------|-----------|
| C  | 0.000000 | 0.000000  | 0.294786  |
| C  | 0.000000 | -1.274179 | 0.998501  |
| C  | 0.000000 | 1.274179  | 0.998501  |
| Al | 0.000000 | 0.000000  | 2.355151  |
| C  | 0.000000 | 0.000000  | -1.041886 |
| Al | 0.000000 | 0.000000  | -3.025421 |
| H  | 0.000000 | 2.277405  | 0.625077  |
| H  | 0.000000 | -2.277405 | 0.625077  |

---



---

|    |           |           |          |
|----|-----------|-----------|----------|
| H  | -3.335224 | -1.719163 | 0.000000 |
| C  | 0.460943  | 0.503499  | 0.000000 |
| C  | -2.786103 | -2.676995 | 0.000000 |
| C  | 0.009642  | -0.636899 | 0.000000 |
| Al | 1.198096  | 2.238648  | 0.000000 |
| Al | -0.789435 | -2.392545 | 0.000000 |
| C  | 1.943198  | 4.022272  | 0.000000 |
| H  | 0.189737  | -3.619158 | 0.000000 |

---
